# Supplementary material for: QSAR modeling for reaction rate constants of eaq− with diverse organic compounds in water
Source: Royal Society of Chemistry journal article supplement (doi:10.1039/d0ew00244e), 2020-01-01
Supplement: d0ew00244e1.pdf [file d0ew00244e1.pdf]

## Appendix A. Supplementary data

### QSAR Modeling for Reaction Rate Constants of $e_{aq}^-$ with Diverse Organic Compounds in Water

Shanshan Zheng<sup>2,3</sup>, Chao Li<sup>2</sup>, Gaoliang Wei<sup>1,\*</sup>

<sup>1</sup> Key Laboratory of Groundwater Resources and Environment (Ministry of Education), College of New Energy and Environment, Jilin University, Changchun 130021, China

<sup>2</sup> School of Environment, Northeast Normal University, Changchun, 130117, China

<sup>3</sup> State Key Laboratory of Urban Water Resource and Environment, Harbin Institute of Technology, Harbin, 150090, China

#### Corresponding Author

\* Phone/fax: +86-413-88502606; e-mail: [glwei@jlu.edu.cn](mailto:glwei@jlu.edu.cn)

## Content

|                                                                                                                                                                                                                                                                                                                            |    |
|----------------------------------------------------------------------------------------------------------------------------------------------------------------------------------------------------------------------------------------------------------------------------------------------------------------------------|----|
| Text A1. Definition of outliers.....                                                                                                                                                                                                                                                                                       | 3  |
| Fig. A1. Distribution of experimental $\log k_{\text{eq}}$ - values in the training set and validation set. ....                                                                                                                                                                                                           | 3  |
| Fig. A2. Progress in $R^2_{\text{TR}}$ and $Q^2_{\text{LOO}}$ as the number of descriptor increases during the MLR model development.....                                                                                                                                                                                  | 3  |
| Table A1. List of compounds in the QSAR modeling .....                                                                                                                                                                                                                                                                     | 4  |
| Table A2. Information for outliers in the SVM-based model. ....                                                                                                                                                                                                                                                            | 45 |
| Table A3. Compounds with $h > h^*$ and $ \delta  < 3$ in the MLR- and SVM-based models .....                                                                                                                                                                                                                               | 45 |
| Table A4. List of experimental and predicted $\log k_{\text{eq}}$ - by the current MLR model and previous phenyl-based compounds MLR model for some new classes of compounds, as well as deviation ( $\log k_{\text{pre}}/ \log k_{\text{exp}}$ ) between the predicted $\log k_{\text{eq}}$ - and experiamental ones..... | 47 |
| Table A5. List of experimental and predicted $\log k_{\text{eq}}$ - by the current MLR model and previous aliphatic compounds MLR model for some new classes of compounds, as well as deviation ( $\log k_{\text{pre}}/ \log k_{\text{exp}}$ ) between the predicted $\log k_{\text{eq}}$ - and experiamental ones.....    | 51 |
| Table A6. Comparison of prediction accuracy of different models for some new compounds classes in Table A4 and A5. ....                                                                                                                                                                                                    | 54 |
| Table A7. Classification of organic compounds based on different functional groups. ....                                                                                                                                                                                                                                   | 54 |

**Text A1.** Definition of outliers.

Herein, the whisker length is referred to as the upper outer and lower outer fence values.

$$\text{Upper outer fence} = 75\text{th Percentile} + (1.5 \times \text{Interquartile Range}) \quad \text{Eq. (S1)}$$

$$\text{Lower outer fence} = 25\text{th Percentile} - (1.5 \times \text{Interquartile Range}) \quad \text{Eq. (S2)}$$

Data points that lie outside of the fence values are considered to be outliers.

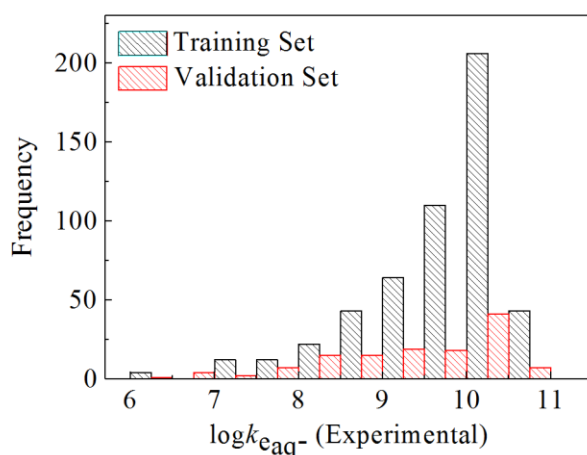

**Fig. A1.** Distribution of experimental  $\log k_{\text{eaq-}}$  values in the training set and validation set.

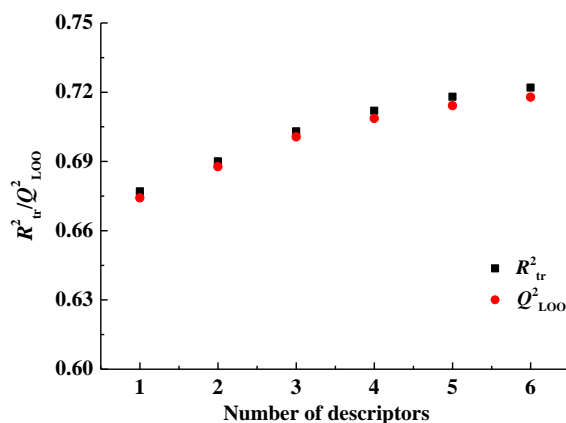

**Fig. A2.** Progress in  $R^2_{\text{TR}}$  and  $Q^2_{\text{LOO}}$  as the number of descriptor increases during the MLR model development.

**Table A1.** List of compounds in the QSAR modeling

| ID | CAS     | Name                       | Charge | pH   | $\log k_{e_{aq}^-}$<br>(Exp.) | $\log k_{e_{aq}^-}$<br>(MLR) | $\log k_{e_{aq}^-}$<br>(SVM) | Ref |
|----|---------|----------------------------|--------|------|-------------------------------|------------------------------|------------------------------|-----|
| 1  | 50-18-0 | Cyclophosphamide           | 0      | 6.8  | 8.93                          | 8.93                         | 8.82                         | 1   |
| 2  | 50-21-5 | 2-Hydroxypropionic acid    | 0      | 3    | 8.80                          | 8.87                         | 8.85                         | 1   |
| 3  | 50-21-5 | 2-Hydroxypropionate        | -1     | 7    | 7.76                          | 7.62                         | 7.37                         | 1   |
| 4  | 50-32-8 | Benzo[a]pyrene             | 0      | 7    | 9.78                          | 10.42                        | 10.32                        | 1   |
| 5  | 50-53-3 | Chlorpromazine             | 0      | 6.5  | 10.23                         | 9.75                         | 9.94                         | 1   |
| 6  | 50-59-9 | Cephaloridine              | 0      | 6    | 10.45                         | 10.67                        | 10.40                        | 1   |
| 7  | 50-85-1 | 4-Methyl-salicylate        | -1     | 7    | 9.64                          | 9.20                         | 9.26                         | 2   |
| 8  | 51-20-7 | 5-Bromouracil              | 0      | 11   | 10.20                         | 9.90                         | 10.19                        | 1   |
| 9  | 51-21-8 | 5-Fluorouracil             | 0      | 11   | 10.08                         | 9.93                         | 10.13                        | 1   |
| 10 | 51-35-4 | <i>Hydroxyproline</i>      | -1     | 7    | 7.65                          | 7.80                         | 7.48                         | 1   |
| 11 | 51-43-4 | <i>Adrenaline</i>          | 0      | N.A. | 8.40                          | 9.13                         | 9.15                         | 1   |
| 12 | 51-55-8 | Atropine                   | 0      | 9.5  | 9.62                          | 9.36                         | 9.52                         | 1   |
| 13 | 51-85-4 | 2,2'-dithiobis(ethylamine) | 0      | 11.1 | 10.26                         | 9.47                         | 9.72                         | 1   |
| 14 | 54-05-7 | <i>Chloroquine</i>         | 0      | 8.5  | 10.68                         | 10.12                        | 10.26                        | 1   |

|    |         |                       |    |         |       |       |       |   |
|----|---------|-----------------------|----|---------|-------|-------|-------|---|
| 15 | 54-25-1 | <i>6-Azauridine</i>   | 0  | 8       | 9.88  | 10.26 | 10.44 | 1 |
| 16 | 54-47-7 | Pyridoxal phosphate   | -2 | 7       | 10.20 | 10.51 | 10.23 | 1 |
| 17 | 54-85-3 | Isoniazid             | 0  | N.A.    | 10.47 | 9.96  | 10.29 | 3 |
| 18 | 55-18-5 | N-Nitrosodiethylamine | 0  | 7       | 10.21 | 9.66  | 9.95  | 4 |
| 19 | 55-21-0 | Benzamide             | 0  | 5.7     | 10.28 | 9.72  | 10.07 | 1 |
| 20 | 55-98-1 | Busulfan              | 0  | 6.8     | 7.48  | 7.90  | 7.35  | 1 |
| 21 | 56-23-5 | Carbon tetrachloride  | 0  | N.A.    | 10.11 | 10.99 | 10.24 | 1 |
| 22 | 56-49-5 | 3-Methylcholanthrene  | 0  | 7       | 9.78  | 10.20 | 10.27 | 1 |
| 23 | 56-75-7 | Chloramphenicol       | 0  | N.A.    | 10.53 | 10.74 | 10.51 | 1 |
| 24 | 56-82-6 | DL-glyceraldehyde     | 0  | N.A.    | 10.40 | 9.66  | 10.02 | 1 |
| 25 | 57-14-7 | 1,1-Dimethylhydrazine | 0  | 12      | 7.38  | 7.73  | 7.30  | 1 |
| 26 | 57-63-6 | Ethynyl estradiol     | 0  | 7       | 8.16  | 9.17  | 9.22  | 5 |
| 27 | 57-67-0 | <i>Sulfaguanidine</i> | 0  | N.A.    | 9.93  | 9.56  | 9.80  | 1 |
| 28 | 57-68-1 | Sulfamethazine        | 0  | 5.4-6.0 | 10.38 | 9.79  | 10.07 | 6 |
| 29 | 58-08-2 | Caffeine              | 0  | 7       | 10.08 | 9.65  | 9.92  | 1 |
| 30 | 58-27-5 | Menadione             | 0  | 7       | 10.49 | 11.02 | 10.44 | 1 |
| 31 | 58-55-9 | Theophylline          | 0  | 13      | 9.00  | 9.45  | 9.66  | 1 |

|    |         |                           |    |      |       |       |       |   |
|----|---------|---------------------------|----|------|-------|-------|-------|---|
| 32 | 58-61-7 | Adenosine                 | 0  | 7    | 10.08 | 9.55  | 9.80  | 1 |
| 33 | 58-63-9 | Inosine                   | 0  | 6.5  | 9.99  | 9.68  | 9.98  | 1 |
| 34 | 58-96-8 | Uridine                   | 0  | 6    | 10.15 | 9.75  | 10.07 | 1 |
| 35 | 59-30-3 | Folate                    | -2 | 12   | 10.04 | 10.52 | 10.30 | 1 |
| 36 | 59-87-0 | Nitrofurazone             | 0  | N.A. | 10.45 | 10.92 | 10.40 | 1 |
| 37 | 59-89-2 | N-Nitrosomorpholine       | 0  | 7    | 10.34 | 9.74  | 10.04 | 4 |
| 38 | 60-23-1 | 2-Aminoethanethiol        | 0  | N.A. | 9.23  | 8.60  | 8.29  | 1 |
| 39 | 60-34-4 | <i>Methylhydrazine</i>    | 0  | 12   | 6.81  | 7.65  | 7.22  | 1 |
| 40 | 60-35-5 | <i>Acetamide</i>          | 0  | 5.2  | 7.65  | 8.47  | 8.10  | 1 |
| 41 | 60-54-8 | Tetracycline              | 0  | 6.8  | 10.28 | 10.40 | 10.36 | 1 |
| 42 | 61-32-5 | Methicillin               | -1 | 6    | 9.45  | 9.40  | 9.57  | 1 |
| 43 | 61-33-6 | Penicillin G              | -1 | 6    | 9.45  | 9.28  | 9.40  | 1 |
| 44 | 61-72-3 | Cloxacillin               | -1 | 6    | 9.88  | 9.76  | 9.98  | 1 |
| 45 | 62-56-6 | Thiourea                  | 0  | 6.4  | 9.46  | 9.08  | 9.08  | 1 |
| 46 | 62-75-9 | N-Nitrosodimethylamine    | 0  | 7    | 10.15 | 9.63  | 9.91  | 4 |
| 47 | 63-37-6 | Cytidylate                | -2 | 7    | 9.83  | 9.77  | 9.97  | 1 |
| 48 | 63-74-1 | 4-Aminobenzenesulfonamide | 0  | N.A. | 9.87  | 9.51  | 9.74  | 1 |

|    |         |                              |    |      |       |       |       |   |
|----|---------|------------------------------|----|------|-------|-------|-------|---|
| 49 | 65-23-6 | Pyridoxine                   | 0  | 6.8  | 10.34 | 9.54  | 9.80  | 1 |
| 50 | 65-46-3 | Cytidine                     | 1  | 7    | 10.11 | 10.57 | 10.50 | 1 |
| 51 | 65-71-4 | Thymine                      | 0  | 5.5  | 10.26 | 9.66  | 9.97  | 1 |
| 52 | 65-85-0 | Benzoic acid                 | 0  | 3    | 9.85  | 9.92  | 10.27 | 1 |
| 53 | 66-22-8 | Uracil                       | 0  | 7    | 10.18 | 9.72  | 10.05 | 1 |
| 54 | 66-71-7 | 4,5-Diazaphenanthrene        | 0  | 7    | 10.26 | 10.08 | 10.32 | 1 |
| 55 | 66-72-8 | Pyridoxal                    | 0  | 6.8  | 9.95  | 10.44 | 10.44 | 7 |
| 56 | 67-20-9 | Nitrofurantoin               | 0  | 7    | 10.53 | 11.01 | 10.40 | 1 |
| 57 | 67-52-7 | <i>Barbituric acid</i>       | 0  | 2.6  | 10.04 | 9.76  | 10.15 | 1 |
| 58 | 67-64-1 | 2-Propanone                  | 0  | N.A. | 9.89  | 9.25  | 9.42  | 1 |
| 59 | 67-66-3 | Trichloromethane             | 0  | 7    | 10.48 | 10.31 | 10.35 | 1 |
| 60 | 68-12-2 | <i>N,N-Dimethylformamide</i> | 0  | N.A. | 8.60  | 8.56  | 8.22  | 1 |
| 61 | 68-94-0 | 6-Hydroxypurine              | 0  | 6.5  | 9.98  | 9.60  | 9.87  | 1 |
| 62 | 69-53-4 | Ampicillin                   | -1 | 6    | 9.76  | 9.31  | 9.45  | 1 |
| 63 | 69-65-8 | <i>D-Mannitol</i>            | 0  | 7    | 6.85  | 7.90  | 7.36  | 1 |
| 64 | 69-89-6 | 2,6-Dihydroxypurine          | 0  | N.A. | 9.59  | 9.72  | 10.01 | 1 |
| 65 | 69-93-2 | <i>Uric acid</i>             | 0  | 5    | 9.78  | 9.58  | 9.82  | 1 |

|    |         |                       |    |               |       |       |       |   |
|----|---------|-----------------------|----|---------------|-------|-------|-------|---|
| 66 | 71-30-7 | Cytosine              | 0  | 7             | 10.11 | 9.58  | 9.85  | 1 |
| 67 | 71-33-0 | <i>5-Azauracil</i>    | 0  | 8             | 9.45  | 9.85  | 10.27 | 1 |
| 68 | 71-55-6 | 1,1,1-Trichloroethane | 0  | N.A.          | 10.40 | 10.07 | 10.27 | 1 |
| 69 | 72-14-0 | Sulfathiazole         | 0  | N.A.          | 10.08 | 9.68  | 9.95  | 1 |
| 70 | 73-24-5 | <i>Adenine</i>        | 0  | 11            | 9.04  | 9.59  | 9.87  | 1 |
| 71 | 73-40-5 | Guanine               | 0  | 7             | 10.15 | 9.56  | 9.80  | 1 |
| 72 | 74-11-3 | 4-Chlorobenzoate      | -1 | 10.5-<br>11.5 | 9.78  | 9.50  | 9.59  | 8 |
| 73 | 74-86-2 | Acetylene             | 0  | N.A.          | 7.30  | 8.11  | 7.64  | 1 |
| 74 | 74-87-3 | Methyl chloride       | 0  | N.A.          | 8.67  | 8.70  | 8.85  | 1 |
| 75 | 74-88-4 | Methyl iodide         | 0  | N.A.          | 10.20 | 9.78  | 9.96  | 1 |
| 76 | 74-95-3 | Methylene bromide     | 0  | 4             | 10.30 | 9.95  | 10.20 | 1 |
| 77 | 74-96-4 | Ethyl bromide         | 0  | 7             | 9.90  | 9.57  | 9.87  | 1 |
| 78 | 74-98-6 | Propane               | 0  | N.A.          | 6.32  | 7.15  | 6.45  | 1 |
| 79 | 75-00-3 | Chloroethane          | 0  | N.A.          | 8.85  | 8.64  | 8.64  | 1 |
| 80 | 75-01-4 | Vinyl chloride        | 0  | 6.5           | 8.40  | 9.23  | 9.35  | 1 |
| 81 | 75-03-6 | Iodoethane            | 0  | N.A.          | 10.18 | 9.73  | 9.95  | 1 |



|    |         |                               |   |      |       |       |       |   |
|----|---------|-------------------------------|---|------|-------|-------|-------|---|
| 82 | 75-05-8 | Acetonitrile                  | 0 | N.A. | 7.64  | 8.20  | 7.85  | 1 |
| 83 | 75-07-0 | Acetaldehyde                  | 0 | 6.6  | 9.64  | 9.40  | 9.67  | 1 |
| 84 | 75-11-6 | Methylene iodide              | 0 | 4    | 10.53 | 10.73 | 10.45 | 1 |
| 85 | 75-12-7 | Formamide                     | 0 | N.A. | 7.30  | 8.53  | 8.22  | 1 |
| 86 | 75-18-3 | Dimethyl sulfide              | 0 | N.A. | 7.30  | 8.38  | 7.95  | 1 |
| 87 | 75-25-2 | Bromoform                     | 0 | 7    | 10.00 | 10.38 | 10.13 | 1 |
| 88 | 75-31-0 | Isopropylamine                | 0 | 12.3 | 6.18  | 7.65  | 7.19  | 1 |
| 89 | 75-34-3 | 1,1-Dichloroethane            | 0 | 7    | 9.95  | 9.39  | 9.74  | 1 |
| 90 | 75-35-4 | Vinylidene chloride           | 0 | 6.5  | 10.36 | 9.66  | 9.93  | 1 |
| 91 | 75-45-6 | Chlorodifluoromethane         | 0 | N.A. | 9.46  | 9.37  | 9.59  | 1 |
| 92 | 75-52-5 | <i>Nitromethane</i>           | 0 | 7    | 10.34 | 10.17 | 10.50 | 1 |
| 93 | 75-63-8 | Bromotrifluoromethane         | 0 | 9    | 10.36 | 10.27 | 10.23 | 1 |
| 94 | 75-66-1 | 2-Methyl-2-propanethiol       | 0 | 7    | 9.48  | 8.68  | 8.41  | 1 |
| 95 | 75-69-4 | <i>Trichlorofluoromethane</i> | 0 | 6    | 10.20 | 10.76 | 10.24 | 1 |
| 96 | 75-71-8 | Dichlorodifluoromethane       | 0 | 6    | 10.15 | 10.37 | 10.12 | 1 |
| 97 | 75-72-9 | Chlorotrifluoromethane        | 0 | 9    | 9.64  | 9.74  | 9.61  | 1 |
| 98 | 76-06-2 | Trichloronitromethane         | 0 | N.A. | 10.33 | 11.16 | 10.43 | 9 |

|     |         |                                           |   |      |       |       |       |    |
|-----|---------|-------------------------------------------|---|------|-------|-------|-------|----|
| 99  | 76-13-1 | 1,1,2-Trichlorotrifluoroethane            | 0 | 7    | 10.15 | 10.39 | 10.20 | 1  |
| 100 | 76-22-2 | Camphor                                   | 0 | 9.2  | 9.49  | 9.30  | 9.47  | 1  |
| 101 | 76-38-0 | 2,2-Dichloro-1,1-difluoro-1-methoxyethane | 0 | 7    | 10.15 | 9.57  | 9.95  | 1  |
| 102 | 77-77-0 | <i>Divinyl sulphone</i>                   | 0 | 7    | 10.00 | 9.90  | 10.32 | 1  |
| 103 | 77-81-6 | Tabun                                     | 0 | N.A. | 9.57  | 9.30  | 9.52  | 10 |
| 104 | 78-76-2 | <i>2-Bromobutane</i>                      | 0 | 7    | 9.86  | 9.70  | 9.94  | 1  |
| 105 | 78-81-9 | <i>Isobutylamine</i>                      | 0 | 11.9 | 7.04  | 7.71  | 7.24  | 1  |
| 106 | 78-94-4 | <i>Methyl vinyl ketone</i>                | 0 | 5.8  | 9.40  | 10.05 | 10.35 | 1  |
| 107 | 78-95-5 | Chloroacetone                             | 0 | N.A. | 10.13 | 9.76  | 10.01 | 11 |
| 108 | 79-00-5 | 1,1,2-Trichloroethane                     | 0 | 7    | 9.92  | 9.68  | 10.04 | 1  |
| 109 | 79-01-6 | <i>Trichloroethylene</i>                  | 0 | N.A. | 10.28 | 10.07 | 10.37 | 1  |
| 110 | 79-05-0 | Propionamide                              | 0 | 9.2  | 7.73  | 8.47  | 8.10  | 1  |
| 111 | 79-06-1 | Acrylamide                                | 0 | N.A. | 10.18 | 9.64  | 9.99  | 1  |
| 112 | 79-11-8 | Chloroacetic acid                         | 0 | 1    | 9.84  | 9.15  | 9.31  | 1  |
| 113 | 79-14-1 | Hydroxyacetic acid                        | 0 | 3    | 8.63  | 8.81  | 8.75  | 1  |
| 114 | 79-19-6 | Thiosemicarbazide                         | 0 | 7    | 9.04  | 9.12  | 9.15  | 1  |

|     |         |                                 |    |       |       |       |       |    |
|-----|---------|---------------------------------|----|-------|-------|-------|-------|----|
| 115 | 79-20-9 | <i>Methyl acetate</i>           | 0  | N.A.  | 7.94  | 8.76  | 8.64  | 1  |
| 116 | 79-24-3 | Nitroethane                     | 0  | N.A.  | 10.43 | 10.12 | 10.48 | 1  |
| 117 | 79-27-6 | <i>1,1,2,2-Tetrabromoethane</i> | 0  | 7     | 10.23 | 10.18 | 10.26 | 1  |
| 118 | 79-39-0 | Methacrylamide                  | 0  | 9.2   | 10.38 | 9.49  | 9.79  | 1  |
| 119 | 79-41-4 | 2-Methylpropenoic acid          | 0  | 2-3.7 | 10.28 | 9.77  | 10.18 | 1  |
| 120 | 79-42-5 | 2-Mercaptopropionic acid        | 0  | 1.6-3 | 9.54  | 9.09  | 9.14  | 1  |
| 121 | 80-08-0 | 4,4'-Diamino diphenyl sulfone   | 0  | N.A.  | 9.96  | 9.73  | 9.99  | 12 |
| 122 | 80-15-9 | Cumene hydroperoxide            | 0  | N.A.  | 9.64  | 9.15  | 9.23  | 1  |
| 123 | 80-62-6 | Methyl methacrylate             | 0  | 9.2   | 10.11 | 9.73  | 10.12 | 1  |
| 124 | 83-34-1 | 3-Methylindole                  | 0  | 8.2   | 8.41  | 9.32  | 9.45  | 1  |
| 125 | 83-40-9 | <i>3-Methyl-salicylate</i>      | -1 | 7     | 9.73  | 9.24  | 9.33  | 2  |
| 126 | 83-42-1 | 2-Chloro-6-nitrotoluene         | 0  | N.A.  | 10.52 | 10.71 | 10.50 | 1  |
| 127 | 83-53-4 | 1,4-Dibromonaphthalene          | 0  | N.A.  | 10.48 | 10.27 | 10.30 | 1  |
| 128 | 83-67-0 | <i>Theobromine</i>              | 0  | 13    | 9.34  | 9.68  | 9.95  | 1  |
| 129 | 83-88-5 | <i>Riboflavine</i>              | 0  | 5.9   | 10.36 | 10.97 | 10.39 | 1  |
| 130 | 84-66-2 | <i>Diethyl phthalate</i>        | 0  | N.A.  | 10.00 | 9.91  | 10.26 | 13 |
| 131 | 85-01-8 | Phenanthrene                    | 0  | 12.1  | 9.60  | 9.87  | 10.14 | 1  |

|     |         |                         |    |               |       |       |       |    |
|-----|---------|-------------------------|----|---------------|-------|-------|-------|----|
| 132 | 85-32-5 | Guanosine monophosphate | 0  | 6             | 9.49  | 9.37  | 9.53  | 1  |
| 133 | 86-42-0 | Amodiaquine             | 0  | 7.1           | 10.59 | 10.19 | 10.27 | 1  |
| 134 | 86-53-3 | 1-Naphthonitrile        | 0  | 11            | 10.32 | 10.32 | 10.40 | 1  |
| 135 | 86-73-7 | <i>Fluorene</i>         | 0  | 12.1          | 9.70  | 9.69  | 9.96  | 1  |
| 136 | 87-08-1 | Penicillin V            | -1 | 6             | 9.43  | 9.23  | 9.31  | 1  |
| 137 | 88-67-5 | 2-Iodobenzoate          | -1 | 10.5-<br>11.5 | 9.66  | 9.86  | 10.06 | 8  |
| 138 | 88-73-3 | 1-Chloro-2-nitrobenzene | 0  | N.A.          | 10.38 | 10.75 | 10.51 | 1  |
| 139 | 88-75-5 | 2-Nitrophenolate        | -1 | 10.5-<br>11.5 | 10.30 | 10.12 | 10.21 | 8  |
| 140 | 89-25-8 | Edaravone               | 0  | 7             | 9.38  | 9.66  | 9.92  | 14 |
| 141 | 89-56-5 | 5-Methyl-salicylate     | -1 | 7             | 9.67  | 9.31  | 9.43  | 2  |
| 142 | 89-59-8 | 4-Chloro-2-nitrotoluene | 0  | N.A.          | 10.52 | 10.77 | 10.50 | 1  |
| 143 | 89-98-5 | 2-Chlorobenzaldehyde    | 0  | 10            | 10.34 | 10.43 | 10.46 | 1  |
| 144 | 90-03-9 | 2-(Chloromercuri)phenol | 0  | 9.4           | 10.04 | 9.94  | 10.13 | 1  |
| 145 | 90-11-9 | 1-Bromonaphthalene      | 0  | N.A.          | 10.26 | 10.15 | 10.23 | 1  |
| 146 | 90-13-1 | 1-Chloronaphthalene     | 0  | N.A.          | 10.15 | 10.06 | 10.22 | 1  |

|     |         |                                     |   |               |       |       |       |    |
|-----|---------|-------------------------------------|---|---------------|-------|-------|-------|----|
| 147 | 90-15-3 | <i>1-Naphthol</i>                   | 0 | 10.5-<br>11.5 | 8.98  | 9.78  | 10.03 | 8  |
| 148 | 90-34-6 | Primaquine                          | 0 | 7.3           | 10.23 | 9.99  | 10.15 | 1  |
| 149 | 90-44-8 | Anthrone                            | 0 | 9.2           | 10.52 | 10.28 | 10.43 | 1  |
| 150 | 90-96-0 | <i>4,4'-Dimethoxybenzophenone</i>   | 0 | N.A.          | 10.15 | 10.13 | 10.33 | 1  |
| 151 | 90-99-3 | Chlorodiphenylmethane               | 0 | 8             | 8.98  | 9.80  | 10.08 | 1  |
| 152 | 91-00-9 | Benzhydramine                       | 0 | 11.2          | 8.52  | 9.33  | 9.51  | 1  |
| 153 | 91-02-1 | 2-Benzoylpyridine                   | 0 | 9             | 10.40 | 10.40 | 10.46 | 1  |
| 154 | 91-18-9 | Pteridine                           | 0 | 6             | 10.48 | 10.80 | 10.46 | 1  |
| 155 | 91-19-0 | <i>Quinoxaline</i>                  | 0 | 7             | 10.49 | 10.38 | 10.46 | 1  |
| 156 | 91-20-3 | Naphthalene                         | 0 | N.A.          | 9.70  | 9.84  | 10.11 | 1  |
| 157 | 91-22-5 | quinoline                           | 0 | N.A.          | 9.85  | 10.07 | 10.31 | 15 |
| 158 | 91-59-8 | 2-Naphthylamine                     | 0 | 7             | 10.26 | 9.79  | 10.02 | 1  |
| 159 | 91-64-5 | Coumarin                            | 0 | N.A.          | 10.20 | 10.29 | 10.41 | 1  |
| 160 | 92-52-4 | Biphenyl                            | 0 | 9             | 10.08 | 9.65  | 9.93  | 1  |
| 161 | 92-55-7 | 5-Nitro-2-furaldehyde diacetate     | 0 | 7             | 10.48 | 10.80 | 10.48 | 1  |
| 162 | 92-75-1 | 3-Hydroxy-N-(2',4'-dimethylphenyl)- | 0 | 7             | 10.38 | 10.17 | 10.32 | 1  |

| 2-naphthamide |         |                                 |    |               |      |       |       |    |
|---------------|---------|---------------------------------|----|---------------|------|-------|-------|----|
| 163           | 92-84-2 | Phenothiazine                   | 0  | 8.7           | 9.74 | 9.57  | 9.79  | 1  |
| 164           | 92-87-5 | Benzidine                       | 0  | 7             | 9.32 | 9.38  | 9.53  | 1  |
| 165           | 94-13-3 | Propylparaben                   | 0  | N.A.          | 9.99 | 9.73  | 10.03 | 16 |
| 166           | 95-14-7 | <i>Benzotriazole</i>            | 0  | 10.5          | 9.23 | 10.05 | 10.30 | 1  |
| 167           | 95-49-8 | 2-Chlorotoluene                 | 0  | N.A.          | 9.04 | 9.35  | 9.48  | 1  |
| 168           | 95-50-1 | 1,2-Dichlorobenzene             | 0  | 11            | 9.67 | 9.65  | 9.81  | 1  |
| 169           | 95-51-2 | <i>2-Chloroaniline</i>          | 0  | N.A.          | 8.73 | 9.39  | 9.45  | 1  |
| 170           | 95-56-7 | 2-Bromophenol                   | 0  | 5             | 9.86 | 9.60  | 9.67  | 1  |
| 171           | 95-57-8 | <i>2-Chlorophenol</i>           | 0  | 5             | 9.11 | 9.44  | 9.55  | 1  |
| 172           | 95-57-8 | 2-Chlorophenolate               | -1 | 10.5-<br>11.5 | 8.38 | 8.96  | 8.84  | 8  |
| 173           | 95-75-0 | 3,4-Dichlorotoluene             | 0  | N.A.          | 9.23 | 9.61  | 9.76  | 1  |
| 174           | 96-24-2 | <i>3-Chloro-1,2-propanediol</i> | 0  | N.A.          | 8.83 | 8.76  | 8.66  | 1  |
| 175           | 96-33-3 | Methyl acrylate                 | 0  | 11            | 9.97 | 9.81  | 10.23 | 1  |
| 176           | 96-35-5 | Methyl hydroxyacetate           | 0  | 10.6          | 8.68 | 8.79  | 8.71  | 1  |
| 177           | 97-63-2 | Ethyl methacrylate              | 0  | N.A.          | 9.38 | 9.71  | 10.09 | 1  |

|     |         |                             |    |               |       |       |       |   |
|-----|---------|-----------------------------|----|---------------|-------|-------|-------|---|
| 178 | 97-77-8 | Tetraethylthiuram disulfide | 0  | 9.2           | 10.04 | 10.23 | 10.33 | 1 |
| 179 | 98-07-7 | Benzotrichloride            | 0  | 10            | 9.92  | 10.09 | 10.20 | 1 |
| 180 | 98-08-8 | Benzotrifluoride            | 0  | 11            | 9.26  | 9.68  | 9.88  | 1 |
| 181 | 98-10-2 | Benzenesulfonamide          | 0  | 11            | 9.99  | 9.68  | 10.05 | 1 |
| 182 | 98-11-3 | Benzenesulfonate            | -1 | 10.5-<br>11.5 | 9.60  | 9.27  | 9.39  | 8 |
| 183 | 98-83-9 | 1-Methyl-1-phenylethylene   | 0  | 5.5           | 9.48  | 9.60  | 9.87  | 1 |
| 184 | 98-86-2 | Acetophenone                | 0  | 9.2           | 10.23 | 10.06 | 10.35 | 1 |
| 185 | 98-92-0 | 3-Pyridinecarboxamide       | 0  | 7.5           | 10.38 | 9.89  | 10.24 | 1 |
| 186 | 98-95-3 | Nitrobenzene                | 0  | N.A.          | 10.58 | 10.63 | 10.51 | 1 |
| 187 | 99-04-7 | 3-Methylbenzoate            | -1 | 10.5-<br>11.5 | 9.41  | 9.25  | 9.34  | 8 |
| 188 | 99-06-9 | 3-Hydroxybenzoate           | -2 | 10.5-<br>11.5 | 9.04  | 8.80  | 8.77  | 8 |
| 189 | 99-94-5 | 4-methylbenzoate            | -1 | 10.5-<br>11.5 | 9.48  | 9.21  | 9.28  | 8 |
| 190 | 99-96-7 | 4-Hydroxybenzoate           | -2 | 10.5-<br>11.5 | 8.60  | 8.52  | 8.37  | 8 |

|     |          |                                 |    |               |       |       |       |   |
|-----|----------|---------------------------------|----|---------------|-------|-------|-------|---|
| 191 | 99-98-9  | N,N-Dimethyl-p-phenylenediamine | 0  | 9             | 8.20  | 9.18  | 9.24  | 1 |
| 192 | 99-99-0  | 4-Nitrotoluene                  | 0  | 11            | 10.28 | 10.61 | 10.50 | 1 |
| 193 | 100-00-5 | 1-Chloro-4-nitrobenzene         | 0  | N.A.          | 10.75 | 10.80 | 10.51 | 1 |
| 194 | 100-02-7 | <i>4-Nitrophenol</i>            | 0  | 5.5           | 10.64 | 10.58 | 10.47 | 1 |
| 195 | 100-02-7 | <i>4-Nitrophenolate</i>         | -1 | 10.5-<br>11.5 | 10.40 | 10.13 | 10.22 | 8 |
| 196 | 100-19-6 | 4-Nitroacetophenone             | 0  | 6.8           | 10.61 | 10.89 | 10.46 | 1 |
| 197 | 100-21-0 | Terephthalate                   | -2 | 10.5-<br>11.5 | 9.86  | 9.29  | 9.41  | 8 |
| 198 | 100-42-5 | Ethenylbenzene                  | 0  | 5.5           | 9.48  | 9.74  | 10.03 | 1 |
| 199 | 100-44-7 | <i>Benzyl chloride</i>          | 0  | N.A.          | 9.18  | 9.67  | 9.93  | 1 |
| 200 | 100-46-9 | Benzenemethanamine              | 0  | 11.2          | 7.90  | 9.10  | 9.13  | 1 |
| 201 | 100-47-0 | Cyanobenzene                    | 0  | 7.16          | 10.23 | 9.92  | 10.28 | 1 |
| 202 | 100-51-6 | <i>Benzenemethanol</i>          | 0  | 6.5           | 8.30  | 9.11  | 9.17  | 1 |
| 203 | 100-52-7 | Benzaldehyde                    | 0  | 7             | 10.38 | 10.18 | 10.43 | 1 |
| 204 | 100-53-8 | Benzyl mercaptan                | 0  | 7             | 9.94  | 9.35  | 9.55  | 1 |
| 205 | 100-65-2 | N-Phenylhydroxylamine           | 0  | N.A.          | 9.26  | 9.17  | 9.23  | 1 |



|     |          |                                 |    |               |       |       |       |   |
|-----|----------|---------------------------------|----|---------------|-------|-------|-------|---|
| 206 | 100-75-4 | N-Nitrosopiperidine             | 0  | 7             | 10.24 | 9.66  | 9.94  | 4 |
| 207 | 101-43-9 | Cyclohexyl methacrylate         | 0  | 7             | 9.30  | 9.71  | 10.10 | 1 |
| 208 | 102-04-5 | 1,3-Diphenyl-2-propanone        | 0  | 9.2           | 10.04 | 9.69  | 9.99  | 1 |
| 209 | 103-83-3 | N,N-Dimethylbenzylamine         | 0  | 11.1          | 8.18  | 9.20  | 9.27  | 1 |
| 210 | 103-85-5 | Phenylthiourea                  | 0  | 9.2           | 9.62  | 9.58  | 9.83  | 1 |
| 211 | 103-90-2 | Acetaminophen                   | 0  | 7             | 8.40  | 9.29  | 9.41  | 1 |
| 212 | 104-15-4 | <i>4-Methylbenzenesulfonate</i> | -1 | 10.5-<br>11.5 | 9.22  | 9.21  | 9.31  | 8 |
| 213 | 104-57-4 | Benzyl formate                  | 0  | N.A.          | 9.18  | 9.36  | 9.60  | 1 |
| 214 | 104-88-1 | 4-Chlorobenzaldehyde            | 0  | 10            | 10.34 | 10.38 | 10.44 | 1 |
| 215 | 105-37-3 | <i>Ethyl propionate</i>         | 0  | N.A.          | 7.88  | 8.71  | 8.55  | 1 |
| 216 | 105-55-5 | 1,3-Diethyl-2-thiourea          | 0  | 7             | 8.70  | 9.03  | 8.99  | 1 |
| 217 | 105-56-6 | Ethyl cyanoacetate              | 0  | 10.92         | 8.51  | 8.98  | 9.08  | 1 |
| 218 | 106-39-8 | 1-Bromo-4-chlorobenzene         | 0  | 10            | 9.62  | 9.79  | 9.89  | 1 |
| 219 | 106-41-2 | 4-Bromophenol                   | 0  | 5             | 9.80  | 9.73  | 9.76  | 1 |
| 220 | 106-41-2 | 4-Bromophenolate                | -1 | 10.5-<br>11.5 | 9.46  | 9.70  | 9.52  | 8 |

|     |          |                          |    |               |       |       |       |    |
|-----|----------|--------------------------|----|---------------|-------|-------|-------|----|
| 221 | 106-43-4 | 4-Chlorotoluene          | 0  | 11            | 8.65  | 9.37  | 9.49  | 1  |
| 222 | 106-46-7 | 1,4-Dichlorobenzene      | 0  | 11            | 9.70  | 9.69  | 9.84  | 1  |
| 223 | 106-47-8 | <i>4-Chloroaniline</i>   | 0  | N.A.          | 8.72  | 9.41  | 9.48  | 1  |
| 224 | 106-48-9 | 4-Chlorophenol           | 0  | 5             | 9.18  | 9.47  | 9.59  | 1  |
| 225 | 106-48-9 | 4-Chlorophenolate        | -1 | 10.5-<br>11.5 | 8.81  | 8.98  | 8.88  | 8  |
| 226 | 106-51-4 | 1,4-Benzoquinone         | 0  | N.A.          | 10.36 | 11.24 | 10.41 | 1  |
| 227 | 106-94-5 | 1-Bromopropane           | 0  | 7             | 10.00 | 9.51  | 9.82  | 1  |
| 228 | 106-97-8 | Butane                   | 0  | 7.6-8.5       | 6.38  | 7.18  | 6.50  | 1  |
| 229 | 106-99-0 | Butadiene                | 0  | 7             | 9.90  | 9.56  | 9.84  | 1  |
| 230 | 107-04-0 | 1-Bromo-2-chloroethane   | 0  | 7             | 9.90  | 9.78  | 10.03 | 1  |
| 231 | 107-06-2 | 1,2-Dichloroethane       | 0  | N.A.          | 8.81  | 9.25  | 9.58  | 1  |
| 232 | 107-07-3 | 2-Chloroethanol          | 0  | N.A.          | 8.62  | 8.76  | 8.72  | 1  |
| 233 | 107-08-4 | 1-Iodopropane            | 0  | 6.2           | 10.11 | 9.69  | 9.93  | 1  |
| 234 | 107-13-1 | Acrylonitrile            | 0  | N.A.          | 10.00 | 9.89  | 10.31 | 17 |
| 235 | 107-29-9 | Acetaldoxime             | 0  | 10.8          | 7.86  | 8.93  | 8.88  | 1  |
| 236 | 107-96-0 | 3-Mercaptopropionic acid | 0  | 1.6-3.0       | 9.73  | 8.93  | 8.87  | 1  |

|     |          |                                 |    |               |       |       |       |    |
|-----|----------|---------------------------------|----|---------------|-------|-------|-------|----|
| 237 | 107-97-1 | Sarcosine                       | -1 | 7             | 7.20  | 7.53  | 7.33  | 1  |
| 238 | 108-03-2 | 1-Nitropropane                  | 0  | N.A.          | 10.43 | 10.12 | 10.48 | 1  |
| 239 | 108-05-4 | Vinyl acetate                   | 0  | 11            | 9.23  | 9.25  | 9.42  | 1  |
| 240 | 108-13-4 | Malonodiamide                   | 0  | 7             | 9.04  | 8.79  | 8.64  | 1  |
| 241 | 108-19-0 | Biuret                          | 0  | 10.3          | 8.40  | 8.75  | 8.57  | 1  |
| 242 | 108-32-7 | Propylene carbonate             | 0  | N.A.          | 7.86  | 8.28  | 7.90  | 1  |
| 243 | 108-36-1 | 1,3-Dibromobenzene              | 0  | N.A.          | 10.00 | 9.74  | 9.87  | 18 |
| 244 | 108-37-2 | 1-Bromo-3-chlorobenzene         | 0  | 10            | 9.71  | 9.73  | 9.87  | 1  |
| 245 | 108-41-8 | <i>1-Chloro-3-methylbenzene</i> | 0  | N.A.          | 8.94  | 9.36  | 9.49  | 1  |
| 246 | 108-42-9 | 3-Chloroaniline                 | 0  | N.A.          | 8.72  | 9.39  | 9.46  | 1  |
| 247 | 108-43-0 | 3-Chlorophenol                  | 0  | 5             | 9.28  | 9.45  | 9.57  | 1  |
| 248 | 108-43-0 | 3-Chlorophenolate               | -1 | 10.5-<br>11.5 | 8.70  | 8.96  | 8.83  | 8  |
| 249 | 108-48-5 | 2,6-Dimethylpyridine            | 0  | 9.5           | 9.70  | 9.46  | 9.73  | 1  |
| 250 | 108-75-8 | 2,4,6-Trimethylpyridine         | 0  | 9.5           | 9.64  | 9.40  | 9.63  | 1  |
| 251 | 108-80-5 | Cyanuricacid                    | 0  | 6             | 9.15  | 9.14  | 9.31  | 19 |
| 252 | 108-86-1 | Bromobenzene                    | 0  | 10            | 9.58  | 9.61  | 9.71  | 1  |

|     |          |                                        |   |       |       |       |       |   |
|-----|----------|----------------------------------------|---|-------|-------|-------|-------|---|
| 253 | 108-90-7 | <i>Chlorobenzene</i>                   | 0 | 11    | 8.96  | 9.39  | 9.53  | 1 |
| 254 | 108-91-8 | <i>Cyclohexylamine</i>                 | 0 | 11.8  | 6.23  | 7.52  | 7.12  | 1 |
| 255 | 108-99-6 | 3-Methylpyridine                       | 0 | 9.5   | 9.88  | 9.48  | 9.77  | 1 |
| 256 | 109-00-2 | 3-Hydroxypyridine                      | 0 | 6.8   | 10.15 | 9.54  | 9.81  | 1 |
| 257 | 109-12-6 | 2-Aminopyrimidine                      | 0 | 5.8   | 10.08 | 9.70  | 9.99  | 1 |
| 258 | 109-65-9 | 1-Bromobutane                          | 0 | 7     | 9.95  | 9.49  | 9.79  | 1 |
| 259 | 109-69-3 | 1-Chlorobutane                         | 0 | 7.6   | 8.60  | 8.60  | 8.50  | 1 |
| 260 | 110-05-4 | <i>Bis(1,1-dimethylethyl) peroxide</i> | 0 | N.A.  | 8.15  | 8.50  | 8.13  | 1 |
| 261 | 110-14-5 | Succinic diamide                       | 0 | 7.1   | 8.30  | 8.61  | 8.33  | 1 |
| 262 | 110-15-6 | Butanedioic acid                       | 0 | 3-4   | 8.57  | 8.92  | 8.94  | 1 |
| 263 | 110-16-7 | Maleic acid                            | 0 | N.A.  | 10.46 | 10.08 | 10.43 | 1 |
| 264 | 110-22-5 | Diacetyl peroxide                      | 0 | N.A.  | 9.98  | 9.13  | 9.34  | 1 |
| 265 | 110-26-9 | N,N'-Methylenebisacrylamide            | 0 | 7     | 10.45 | 9.76  | 10.13 | 1 |
| 266 | 110-44-1 | Sorbic acid                            | 0 | 2-3.7 | 10.46 | 10.19 | 10.38 | 1 |
| 267 | 110-53-2 | 1-Bromopentane                         | 0 | 7     | 9.90  | 9.47  | 9.77  | 1 |
| 268 | 110-61-2 | Succinonitrile                         | 0 | 3-4   | 9.23  | 8.72  | 8.78  | 1 |
| 269 | 110-86-1 | Pyridine                               | 0 | 7     | 9.89  | 9.48  | 9.79  | 1 |

|     |          |                                       |    |               |       |       |       |    |
|-----|----------|---------------------------------------|----|---------------|-------|-------|-------|----|
| 270 | 110-88-3 | Trioxane                              | 0  | 11            | 6.00  | 7.20  | 6.69  | 1  |
| 271 | 115-39-9 | <i>Bromphenol Blue</i>                | 0  | N.A.          | 10.04 | 10.01 | 10.19 | 1  |
| 272 | 116-43-8 | <i>Sulfasuccidine</i>                 | 0  | N.A.          | 10.15 | 10.01 | 10.26 | 1  |
| 273 | 117-39-5 | Quercetin                             | 0  | 7             | 10.11 | 10.13 | 10.28 | 20 |
| 274 | 117-96-4 | Diatrizoate                           | -1 | N.A.          | 10.33 | 10.40 | 10.33 | 21 |
| 275 | 118-00-3 | Guanosine                             | 0  | 6.7           | 9.78  | 9.36  | 9.52  | 1  |
| 276 | 118-90-1 | o-Toluate                             | -1 | 10.5-<br>11.5 | 9.48  | 9.23  | 9.31  | 8  |
| 277 | 118-91-2 | 2-Chlorobenzoate                      | -1 | 10            | 9.15  | 9.38  | 9.43  | 22 |
| 278 | 119-53-9 | <i>2-Hydroxy-2-phenylacetophenone</i> | 0  | 9.2           | 10.23 | 10.24 | 10.40 | 1  |
| 279 | 119-61-9 | Benzophenone                          | 0  | N.A.          | 10.30 | 10.25 | 10.43 | 1  |
| 280 | 119-65-3 | <i>Isoquinoline</i>                   | 0  | N.A.          | 9.53  | 10.04 | 10.29 | 15 |
| 281 | 120-72-9 | <i>Indole</i>                         | 0  | 11            | 8.41  | 9.33  | 9.47  | 1  |
| 282 | 120-73-0 | <i>Purine</i>                         | 0  | 6             | 10.32 | 9.90  | 10.25 | 1  |
| 283 | 120-83-2 | 2,4-Dichlorophenol                    | 0  | 7             | 8.70  | 9.72  | 9.84  | 1  |
| 284 | 120-92-3 | <i>Cyclopentanone</i>                 | 0  | N.A.          | 9.87  | 9.36  | 9.56  | 23 |
| 285 | 121-14-2 | 2,4-Dinitrotoluene                    | 0  | N.A.          | 10.38 | 10.78 | 10.51 | 24 |

|     |          |                                       |   |             |       |       |       |    |
|-----|----------|---------------------------------------|---|-------------|-------|-------|-------|----|
| 286 | 121-73-3 | 1-Chloro-3-nitrobenzene               | 0 | N.A.        | 10.49 | 10.83 | 10.51 | 1  |
| 287 | 122-39-4 | Diphenylamine                         | 0 | 9.2         | 9.18  | 9.36  | 9.51  | 1  |
| 288 | 123-38-6 | Propionaldehyde                       | 0 | N.A.        | 9.53  | 9.45  | 9.73  | 1  |
| 289 | 123-39-7 | <i>N-Methylformamide</i>              | 0 | 9.2         | 7.85  | 8.51  | 8.17  | 1  |
| 290 | 123-56-8 | Succinimide                           | 0 | 11.4        | 8.96  | 9.35  | 9.60  | 1  |
| 291 | 123-56-8 | <i>Succinimide</i>                    | 1 | 6.5         | 10.04 | 10.47 | 10.58 | 1  |
| 292 | 123-75-1 | <i>Pyrrolidine</i>                    | 0 | 12.08       | 6.62  | 7.63  | 7.23  | 1  |
| 293 | 127-06-0 | Acetone oxime                         | 0 | 7           | 8.54  | 8.82  | 8.67  | 1  |
| 294 | 127-07-1 | <i>Hydroxyurea</i>                    | 0 | 6.8         | 8.68  | 8.26  | 7.81  | 1  |
| 295 | 127-18-4 | <i>Tetrachloroethylene</i>            | 0 | N.A.        | 10.62 | 10.46 | 10.54 | 1  |
| 296 | 127-19-5 | N,N-Dimethylacetamide                 | 0 | 9.2<br>N,A, | 7.32  | 8.53  | 8.17  | 1  |
| 297 | 127-79-7 | Sulfamerazine                         | 0 | 5.4-6       | 10.30 | 9.85  | 10.12 | 6  |
| 298 | 128-53-0 | N-Ethylmaleimide                      | 0 | 6           | 10.58 | 10.63 | 10.51 | 1  |
| 299 | 130-95-0 | Quinine                               | 0 | 8.5         | 10.23 | 10.11 | 10.29 | 1  |
| 300 | 131-11-3 | Dimethyl phthalate                    | 0 | 7           | 10.20 | 9.91  | 10.27 | 25 |
| 301 | 131-69-1 | 4-(2-Acetylsulfamyl)phthalanilic acid | 0 | N.A.        | 9.87  | 10.13 | 10.36 | 1  |

|     |          |                                      |   |               |       |       |       |    |
|-----|----------|--------------------------------------|---|---------------|-------|-------|-------|----|
| 302 | 134-81-6 | Benzil                               | 0 | N.A.          | 10.48 | 10.58 | 10.46 | 1  |
| 303 | 135-19-3 | <i>2-Naphthol</i>                    | 0 | 10.5-<br>11.5 | 9.08  | 9.82  | 10.08 | 8  |
| 304 | 137-18-8 | 2,5-Dimethyl-1,4-benzoquinone        | 0 | 7.2           | 10.49 | 11.12 | 10.42 | 1  |
| 305 | 138-89-6 | <i>N,N-Dimethyl-4-nitrosoaniline</i> | 0 | N.A.          | 10.53 | 10.63 | 10.37 | 1  |
| 306 | 140-10-3 | <i>trans-Cinnamic acid</i>           | 0 | 2-3.7         | 10.34 | 10.32 | 10.42 | 1  |
| 307 | 140-11-4 | Benzyl acetate                       | 0 | N.A.          | 9.04  | 9.29  | 9.48  | 1  |
| 308 | 140-88-5 | Ethyl acrylate                       | 0 | 11            | 9.94  | 9.80  | 10.22 | 1  |
| 309 | 141-05-9 | Diethyl maleate                      | 0 | N.A.          | 10.34 | 10.01 | 10.37 | 17 |
| 310 | 141-43-5 | 2-Aminoethanol                       | 0 | 7.8           | 7.30  | 7.58  | 7.13  | 1  |
| 311 | 141-78-6 | <i>Ethyl acetate</i>                 | 0 | 6.53<br>N.A.  | 7.66  | 8.74  | 8.60  | 1  |
| 312 | 141-82-2 | Malonic acid                         | 0 | N.A.          | 9.20  | 8.98  | 9.06  | 1  |
| 313 | 142-08-5 | 2-Pyridone                           | 0 | 6.8           | 10.15 | 9.51  | 9.78  | 1  |
| 314 | 144-48-9 | Iodoacetamide                        | 0 | N.A.          | 10.70 | 10.19 | 10.33 | 1  |
| 315 | 144-62-7 | Oxalic acid                          | 0 | 1.3           | 10.40 | 10.19 | 10.47 | 1  |
| 316 | 144-82-1 | Sulfamethizole                       | 0 | 5.4-6         | 10.30 | 9.86  | 10.13 | 6  |

|     |          |                                |    |      |       |       |       |    |
|-----|----------|--------------------------------|----|------|-------|-------|-------|----|
| 317 | 146-17-8 | Flavine mononucleotide         | 0  | 6    | 10.52 | 11.00 | 10.39 | 1  |
| 318 | 153-18-4 | Rutin                          | 0  | 6.9  | 9.88  | 10.28 | 10.35 | 20 |
| 319 | 253-52-1 | Phthalazine                    | 0  | 7    | 10.54 | 10.18 | 10.39 | 1  |
| 320 | 260-94-6 | Acridine                       | 0  | 10   | 10.11 | 10.53 | 10.39 | 1  |
| 321 | 288-47-1 | Thiazole                       | 0  | 8    | 9.32  | 9.53  | 9.84  | 1  |
| 322 | 289-80-5 | Pyridazine                     | 0  | 7    | 10.34 | 9.99  | 10.28 | 1  |
| 323 | 289-95-2 | Pyrimidine                     | 0  | 7    | 10.30 | 9.79  | 10.15 | 1  |
| 324 | 290-37-9 | Pyrazine                       | 0  | 7    | 10.32 | 9.99  | 10.31 | 1  |
| 325 | 290-87-9 | 1,3,5-Triazine                 | 0  | 6    | 9.72  | 9.95  | 10.34 | 19 |
| 326 | 298-81-7 | 8-Methoxypsoralen              | 0  | N.A. | 10.18 | 10.28 | 10.34 | 1  |
| 327 | 314-50-1 | Orotidine                      | -1 | 7    | 9.95  | 9.66  | 9.92  | 1  |
| 328 | 331-39-5 | caffeate                       | -1 | 7    | 10.15 | 9.65  | 9.87  | 26 |
| 329 | 343-65-7 | Kynurenine                     | Z  | 7.4  | 10.36 | 10.11 | 10.27 | 1  |
| 330 | 350-03-8 | <i>3-Acetylpyridine</i>        | 0  | 9.6  | 10.38 | 10.21 | 10.43 | 1  |
| 331 | 363-72-4 | Pentafluorobenzene             | 0  | 6.5  | 10.20 | 9.87  | 10.17 | 1  |
| 332 | 366-18-7 | <i>2,2'-Dipyridyl</i>          | 0  | 8    | 10.28 | 10.05 | 10.31 | 1  |
| 333 | 366-29-0 | N,N,N',N'-Tetramethylbenzidine | 0  | 9    | 8.23  | 9.37  | 9.53  | 1  |



|     |          |                          |    |               |       |       |       |    |
|-----|----------|--------------------------|----|---------------|-------|-------|-------|----|
| 334 | 367-11-3 | 1,2-Difluorobenzene      | 0  | 6.5           | 9.08  | 9.46  | 9.57  | 1  |
| 335 | 367-12-4 | 2-Fluorophenolate        | -1 | 10.5-<br>11.5 | 8.53  | 8.75  | 8.57  | 8  |
| 336 | 371-41-5 | <i>4-Fluorophenolate</i> | -1 | 10.5-<br>11.5 | 8.08  | 8.95  | 8.85  | 8  |
| 337 | 372-20-3 | 3-Fluorophenolate        | -1 | 10.5-<br>11.5 | 8.30  | 8.75  | 8.57  | 8  |
| 338 | 392-56-3 | <i>Hexafluorobenzene</i> | 0  | N.A.          | 9.93  | 9.89  | 10.29 | 27 |
| 339 | 430-51-3 | <i>Fluoroacetone</i>     | 0  | 6.7           | 9.00  | 9.55  | 9.76  | 1  |
| 340 | 431-03-8 | 2,3-Butanedione          | 0  | N.A.          | 10.00 | 10.55 | 10.46 | 1  |
| 341 | 431-47-0 | Methyl trifluoroacetate  | 0  | 10.62         | 9.28  | 9.68  | 10.01 | 1  |
| 342 | 439-14-5 | Diazepam                 | 0  | N.A.          | 10.08 | 10.20 | 10.35 | 1  |
| 343 | 443-48-1 | Metronidazole            | 0  | N.A.          | 10.48 | 10.62 | 10.48 | 1  |
| 344 | 445-29-4 | <i>2-Fluorobenzoate</i>  | -1 | 10.5-<br>11.5 | 9.49  | 9.40  | 9.45  | 8  |
| 345 | 446-72-0 | Genistein                | 0  | 6.9           | 9.79  | 9.97  | 10.19 | 20 |
| 346 | 455-38-9 | 3-Fluorobenzoate         | -1 | 10.5-<br>11.5 | 9.83  | 9.43  | 9.50  | 8  |

|     |          |                                       |    |               |       |       |       |    |
|-----|----------|---------------------------------------|----|---------------|-------|-------|-------|----|
| 347 | 456-22-4 | 4-Fluorobenzoate                      | -1 | 10.5-<br>11.5 | 9.58  | 9.27  | 9.27  | 8  |
| 348 | 460-19-5 | <i>Cyanogen</i>                       | 0  | 6             | 10.32 | 10.30 | 10.60 | 1  |
| 349 | 461-89-2 | <i>6-Azauracil</i>                    | 0  | 8             | 9.66  | 10.22 | 10.46 | 1  |
| 350 | 464-10-8 | Tribromonitromethane                  | 0  | 7             | 10.36 | 10.41 | 10.35 | 28 |
| 351 | 480-41-1 | <i>Naringenin</i>                     | 0  | 6.9           | 10.08 | 9.99  | 10.19 | 20 |
| 352 | 481-39-0 | 5-Hydroxy-1,4-naphthoquinone          | 0  | 6.4           | 10.45 | 11.07 | 10.40 | 1  |
| 353 | 481-42-5 | 5-hydroxy-2-methyl-1,4-naphthoquinone | 0  | N.A.          | 10.20 | 11.00 | 10.41 | 29 |
| 354 | 484-78-6 | 3-Hydroxykynurenine                   | Z  | 7.4           | 10.40 | 10.09 | 10.24 | 1  |
| 355 | 486-25-9 | 9-Fluorenone                          | 0  | N.A.          | 10.43 | 10.65 | 10.43 | 1  |
| 356 | 487-21-8 | Lumazine                              | 0  | 6.3           | 10.46 | 10.52 | 10.49 | 1  |
| 357 | 488-82-4 | Arabinitol                            | 0  | 7             | 7.85  | 7.94  | 7.40  | 1  |
| 358 | 491-67-8 | Baicalein                             | 0  | 7             | 10.04 | 10.25 | 10.34 | 20 |
| 359 | 491-71-4 | Chrysoeriol                           | 0  | 7             | 9.72  | 10.17 | 10.32 | 30 |
| 360 | 494-38-2 | Acridine Orange                       | 0  | 6.5           | 10.48 | 10.29 | 10.28 | 1  |
| 361 | 495-48-7 | (Z)-Diphenyldiazene                   | 0  | 14            | 10.52 | 10.41 | 10.42 | 1  |

|     |          |                                 |    |               |       |       |       |    |
|-----|----------|---------------------------------|----|---------------|-------|-------|-------|----|
| 362 | 495-54-5 | Chrysoidin                      | 0  | 7             | 9.86  | 10.36 | 10.31 | 1  |
| 363 | 501-52-0 | <i>Hydrocinnamate</i>           | -1 | 5.4           | 8.60  | 9.15  | 9.18  | 1  |
| 364 | 501-98-4 | p-Coumarate                     | -1 | 7             | 10.04 | 9.65  | 9.88  | 20 |
| 365 | 503-64-0 | (Z)-2-Butenoic acid             | 0  | 3             | 10.26 | 9.77  | 10.17 | 1  |
| 366 | 504-07-4 | 5,6-Dihydrouracil               | 0  | 7             | 9.65  | 9.22  | 9.40  | 1  |
| 367 | 507-19-7 | 2-Bromo-2-methylpropane         | 0  | 7             | 9.86  | 9.95  | 9.99  | 1  |
| 368 | 512-85-6 | <i>Ascaridole</i>               | 0  | N.A.          | 9.60  | 9.10  | 9.11  | 1  |
| 369 | 513-36-0 | 1-Chloro-2-methylpropane        | 0  | 5.82          | 8.71  | 8.54  | 8.40  | 1  |
| 370 | 513-86-0 | 3-Hydroxy-2-butanone            | 0  | N.A.          | 9.78  | 9.36  | 9.58  | 1  |
| 371 | 513-88-2 | 1,1-Dichloroacetone             | 0  | N.A.          | 10.09 | 10.21 | 10.30 | 11 |
| 372 | 527-17-3 | 2,3,5,6-Tetramethylbenzoquinone | 0  | 7             | 10.49 | 10.99 | 10.43 | 1  |
| 373 | 527-73-1 | 2-Nitroimidazole                | 0  | 7             | 10.57 | 10.74 | 10.48 | 1  |
| 374 | 529-59-9 | Genistin                        | 0  | 6.9           | 9.79  | 9.98  | 10.21 | 20 |
| 375 | 530-48-3 | <i>1,1-Diphenylethylene</i>     | 0  | 5.5           | 9.11  | 9.76  | 10.04 | 1  |
| 376 | 533-67-5 | <i>Deoxyribose</i>              | 0  | 7             | 7.00  | 7.87  | 7.35  | 1  |
| 377 | 535-80-8 | 3-Chlorobenzoate                | -1 | 10.5-<br>11.5 | 9.74  | 9.50  | 9.60  | 8  |

|     |          |                              |    |      |       |       |       |    |
|-----|----------|------------------------------|----|------|-------|-------|-------|----|
| 378 | 540-36-3 | 1,4-Difluorobenzene          | 0  | 6.5  | 9.30  | 9.60  | 9.73  | 1  |
| 379 | 540-51-2 | 2-Bromoethanol               | 0  | 10   | 9.20  | 9.46  | 9.72  | 1  |
| 380 | 540-54-5 | 1-Chloropropane              | 0  | 7.6  | 8.79  | 8.63  | 8.57  | 1  |
| 381 | 540-73-8 | <i>1,2-Dimethylhydrazine</i> | 0  | 12.4 | 6.79  | 7.64  | 7.36  | 1  |
| 382 | 541-47-9 | 3,3-Dimethylacrylic acid     | 0  | 3    | 10.18 | 9.74  | 10.11 | 1  |
| 383 | 541-73-1 | 1,3-Dichlorobenzene          | 0  | 7    | 10.00 | 9.67  | 9.84  | 31 |
| 384 | 542-59-6 | 2-Hydroxyethyl acetate       | 0  | N.A. | 7.41  | 8.79  | 8.69  | 1  |
| 385 | 542-69-8 | Butyl iodide                 | 0  | 7.6  | 10.08 | 9.67  | 9.93  | 1  |
| 386 | 544-25-2 | <i>Cycloheptatriene</i>      | 0  | N.A. | 9.78  | 9.72  | 9.99  | 1  |
| 387 | 545-06-2 | Trichloroacetonitrile        | 0  | 7    | 10.51 | 10.54 | 10.39 | 1  |
| 388 | 551-16-6 | 6-Aminopenicillanate         | -1 | 6    | 9.56  | 8.97  | 8.88  | 1  |
| 389 | 551-62-2 | 1,2,3,4-Tetrafluorobenzene   | 0  | 6.5  | 10.41 | 9.75  | 9.97  | 1  |
| 390 | 553-26-4 | 4,4'-Dipyridyl               | 0  | 8.3  | 10.40 | 10.09 | 10.39 | 1  |
| 391 | 553-30-0 | 3,6-Diaminoacridine          | 0  | N.A. | 10.53 | 10.31 | 10.30 | 1  |
| 392 | 553-90-2 | Dimethyl oxalate             | 0  | N.A. | 10.30 | 10.09 | 10.41 | 1  |
| 393 | 554-01-8 | 5-Methylcytosine             | 0  | 7.7  | 10.00 | 9.56  | 9.82  | 1  |
| 394 | 554-12-1 | <i>Methyl propionate</i>     | 0  | 6.81 | 7.95  | 8.73  | 8.59  | 1  |

|     |          |                         |    |               |       |       |       |    |
|-----|----------|-------------------------|----|---------------|-------|-------|-------|----|
| 395 | 554-84-7 | 3-Nitrophenolate        | -1 | 10.5-<br>11.5 | 10.40 | 10.52 | 10.25 | 8  |
| 396 | 555-15-7 | Nifuroxime              | 0  | 6.8           | 10.58 | 10.93 | 10.43 | 1  |
| 397 | 556-33-2 | Glycylglycylglycine     | Z  | 6.1           | 9.04  | 9.29  | 9.41  | 1  |
| 398 | 556-50-3 | <i>Glycylglycine</i>    | Z  | 5.9           | 8.34  | 9.22  | 9.37  | 1  |
| 399 | 563-70-2 | Bromonitromethane       | 0  | 7             | 10.50 | 10.29 | 10.50 | 28 |
| 400 | 567-61-3 | 6-Methyl-salicylate     | -1 | 7             | 9.15  | 9.29  | 9.41  | 2  |
| 401 | 578-76-7 | 7-Methylguanine         | 0  | 6             | 10.20 | 9.55  | 9.78  | 1  |
| 402 | 583-39-1 | 2-Mercaptobenzimidazole | 0  | 7             | 9.38  | 9.45  | 9.67  | 1  |
| 403 | 586-76-5 | 4-Bromobenzoate         | -1 | 10.5-<br>11.5 | 9.89  | 9.79  | 9.76  | 8  |
| 404 | 587-04-2 | 3-Chlorobenzaldehyde    | 0  | 10            | 10.34 | 10.40 | 10.45 | 1  |
| 405 | 591-20-8 | 3-Bromophenolate        | -1 | 10.5-<br>11.5 | 9.43  | 9.65  | 9.51  | 8  |
| 406 | 591-20-8 | <i>3-Bromophenol</i>    | 0  | 5             | 9.78  | 9.64  | 9.72  | 1  |
| 407 | 591-22-0 | 3,5-Dimethylpyridine    | 0  | 9.5           | 9.85  | 9.49  | 9.76  | 1  |
| 408 | 591-50-4 | Iodobenzene             | 0  | 11            | 10.08 | 9.69  | 9.90  | 1  |
| 409 | 591-54-8 | 4-Aminopyrimidine       | 0  | 8.2           | 10.04 | 9.48  | 9.74  | 1  |

|     |          |                           |    |               |       |       |       |    |
|-----|----------|---------------------------|----|---------------|-------|-------|-------|----|
| 410 | 592-57-4 | <i>1,3-Cyclohexadiene</i> | 0  | 11            | 9.00  | 9.52  | 9.75  | 1  |
| 411 | 598-32-3 | 3-Buten-2-ol              | 0  | N.A.          | 7.77  | 8.80  | 8.67  | 1  |
| 412 | 598-41-4 | 2-Aminoacetamide          | 0  | 11.4          | 8.45  | 8.46  | 8.07  | 1  |
| 413 | 598-42-5 | <i>2-Hydroxyacetamide</i> | 0  | 8.5           | 8.46  | 8.51  | 8.17  | 1  |
| 414 | 602-94-8 | Pentafluorobenzoate       | -1 | 12            | 9.98  | 9.63  | 9.87  | 1  |
| 415 | 607-34-1 | 5-Nitroquinoline          | 0  | 7             | 10.60 | 10.80 | 10.46 | 1  |
| 416 | 607-35-2 | 8-Nitroquinoline          | 0  | 7             | 10.60 | 10.64 | 10.47 | 1  |
| 417 | 608-31-1 | 2, 6-Dichloraniline       | 0  | 7             | 10.18 | 9.63  | 9.72  | 32 |
| 418 | 609-40-5 | 2-Nitrothiophene          | 0  | 7             | 10.48 | 10.77 | 10.49 | 1  |
| 419 | 611-08-5 | <i>5-Nitrouracil</i>      | 0  | 5.9           | 10.32 | 10.66 | 10.51 | 1  |
| 420 | 611-19-8 | 2-Chlorobenzyl chloride   | 0  | N.A.          | 10.00 | 9.53  | 9.69  | 1  |
| 421 | 611-20-1 | 2-Cyanophenolate          | -1 | 10.5-<br>11.5 | 9.91  | 9.44  | 9.62  | 8  |
| 422 | 613-46-7 | 2-Naphthonitrile          | 0  | 11            | 10.32 | 10.25 | 10.38 | 1  |
| 423 | 613-50-3 | 6-Nitroquinoline          | 0  | 7             | 10.60 | 10.80 | 10.46 | 1  |
| 424 | 613-51-4 | 7-Nitro-quinoline         | 0  | 7             | 10.60 | 10.82 | 10.46 | 1  |
| 425 | 613-94-5 | Benzoic hydrazide         | 0  | N.A.          | 10.19 | 9.63  | 9.95  | 3  |

|     |          |                           |    |               |       |       |       |    |
|-----|----------|---------------------------|----|---------------|-------|-------|-------|----|
| 426 | 614-00-6 | Methylphenyl nitrosamine  | 0  | 7             | 10.36 | 9.93  | 10.21 | 4  |
| 427 | 616-34-2 | Methyl 2-aminoacetate     | 0  | 11.2          | 8.52  | 8.86  | 8.73  | 1  |
| 428 | 616-47-7 | 1-Methylimidazole         | 0  | 10.2          | 7.52  | 8.57  | 8.23  | 1  |
| 429 | 618-51-9 | 3-Iodobenzoate            | -1 | 10.5-<br>11.5 | 10.11 | 9.69  | 9.83  | 8  |
| 430 | 619-58-9 | 4-Iodobenzoate            | -1 | 10.5-<br>11.5 | 9.96  | 9.70  | 9.84  | 8  |
| 431 | 619-65-8 | <i>4-Cyanobenzoate</i>    | -1 | 10.5-<br>11.5 | 10.00 | 10.01 | 10.21 | 8  |
| 432 | 621-08-9 | Dibenzyl sulfoxide        | 0  | 4-7           | 9.54  | 9.48  | 9.71  | 1  |
| 433 | 621-44-3 | 3-Nitrotyrosine           | Z  | 7.3           | 10.48 | 10.62 | 10.42 | 33 |
| 434 | 621-64-7 | N-Nitrosodipropylamine    | 0  | 7             | 10.18 | 9.67  | 9.95  | 4  |
| 435 | 622-24-2 | <i>Phenethyl chloride</i> | 0  | N.A.          | 8.72  | 9.34  | 9.48  | 1  |
| 436 | 623-26-7 | 1,4-Dicyanobenzene        | 0  | N.A.          | 10.45 | 10.49 | 10.52 | 1  |
| 437 | 623-70-1 | Ethyl crotonate           | 0  | N.A.          | 9.91  | 9.69  | 10.07 | 17 |
| 438 | 623-91-6 | Diethyl fumarate          | 0  | N.A.          | 10.34 | 10.43 | 10.53 | 17 |
| 439 | 624-48-6 | Dimethyl maleate          | 0  | N.A.          | 10.52 | 10.03 | 10.39 | 17 |
| 440 | 624-49-7 | Dimethyl fumarate         | 0  | N.A.          | 10.51 | 10.45 | 10.54 | 17 |

|     |          |                                        |   |      |       |       |       |    |
|-----|----------|----------------------------------------|---|------|-------|-------|-------|----|
| 441 | 625-50-3 | N-Ethylacetamide                       | 0 | 6.7  | 7.15  | 8.46  | 8.08  | 1  |
| 442 | 625-77-4 | Diacetamide                            | 0 | 6.5  | 10.04 | 9.50  | 9.78  | 1  |
| 443 | 626-48-2 | <i>6-Methyluracil</i>                  | 0 | 12   | 9.23  | 9.65  | 9.96  | 34 |
| 444 | 626-64-2 | 4-Pyridinol                            | 0 | 6.8  | 9.92  | 9.25  | 9.42  | 1  |
| 445 | 630-10-4 | Selenourea                             | 0 | 6.5  | 9.60  | 9.17  | 9.22  | 1  |
| 446 | 637-84-3 | Glycylglycylglycylglycine              | Z | 6    | 9.18  | 9.10  | 9.10  | 1  |
| 447 | 652-29-9 | 2',3',4',5',6'-Pentafluoroacetophenone | 0 | 7    | 10.28 | 10.57 | 10.39 | 27 |
| 448 | 652-78-8 | <i>Gossypin</i>                        | 0 | N.A. | 10.08 | 10.17 | 10.29 | 20 |
| 449 | 653-34-9 | 2,3,4,5,6-Pentafluorostyrene           | 0 | 14   | 9.98  | 10.30 | 10.27 | 27 |
| 450 | 653-37-2 | Pentafluorobenzaldehyde                | 0 | 7    | 10.38 | 10.84 | 10.46 | 27 |
| 451 | 658-79-7 | <i>GlyTyrOH</i>                        | Z | 5.7  | 8.58  | 9.20  | 9.27  | 1  |
| 452 | 683-08-9 | Diethyl methylphosphonate              | 0 | N.A. | 7.53  | 7.68  | 7.09  | 9  |
| 453 | 687-38-7 | Glycylserine                           | Z | 6.2  | 8.57  | 8.91  | 8.78  | 1  |
| 454 | 694-80-4 | 1-Bromo-2-chlorobenzene                | 0 | 10   | 9.77  | 9.58  | 9.78  | 1  |
| 455 | 695-96-5 | 2-Bromo-4-chlorophenol                 | 0 | 5    | 9.92  | 9.74  | 9.85  | 1  |
| 456 | 696-07-1 | <i>5-Iodouracil</i>                    | 0 | N.A. | 10.23 | 9.86  | 10.07 | 1  |
| 457 | 696-23-1 | 2-Methyl-4-nitroimidazole              | 0 | 7    | 10.48 | 10.47 | 10.47 | 1  |



|     |          |                                |    |               |       |       |       |    |
|-----|----------|--------------------------------|----|---------------|-------|-------|-------|----|
| 458 | 698-63-5 | 5-Nitro-2-furaldehyde          | 0  | 7             | 10.53 | 11.05 | 10.45 | 1  |
| 459 | 704-15-4 | Glycylproline                  | Z  | 6.2           | 8.86  | 9.05  | 9.01  | 1  |
| 460 | 723-46-6 | <i>Sulfamethoxazole</i>        | 0  | 5.4-6         | 10.00 | 9.65  | 9.91  | 6  |
| 461 | 762-75-4 | Tert-butyl formate             | 0  | N.A.          | 8.74  | 8.90  | 8.89  | 35 |
| 462 | 767-00-0 | 4-Hydroxybenzotrile            | -1 | 10.5-<br>11.5 | 9.30  | 9.16  | 9.21  | 8  |
| 463 | 769-78-8 | Vinyl benzoate                 | 0  | 11            | 9.86  | 10.06 | 10.35 | 1  |
| 464 | 771-60-8 | 2,3,4,5,6-Pentafluoroaniline   | 0  | 7             | 9.94  | 9.62  | 9.87  | 20 |
| 465 | 771-61-9 | Pentafluorophenol              | 0  | 4.6           | 10.38 | 9.70  | 10.00 | 20 |
| 466 | 771-62-0 | Pentafluorothiophenolate       | -1 | 7             | 9.82  | 9.56  | 9.94  | 20 |
| 467 | 773-82-0 | pentafluorobenzotrile          | 0  | 7             | 10.43 | 10.66 | 10.43 | 1  |
| 468 | 818-61-1 | 2-Hydroxyethyl acrylate        | 0  | 11            | 9.88  | 9.85  | 10.25 | 36 |
| 469 | 822-38-8 | <i>1,3-Dithiolane-2-thione</i> | 0  | 7             | 10.48 | 10.48 | 10.44 | 1  |
| 470 | 822-84-4 | 3-Nitrothiophene               | 0  | 7             | 10.52 | 10.62 | 10.50 | 1  |
| 471 | 827-15-6 | <i>Iodopentafluorobenzene</i>  | 0  | 7             | 9.75  | 10.53 | 10.48 | 1  |
| 472 | 828-73-9 | Pentafluorophenylhydrazine     | 0  | 7             | 9.93  | 9.63  | 9.80  | 27 |
| 473 | 853-34-9 | Ketophenylbutazone             | 0  | 7.5           | 9.43  | 9.70  | 9.97  | 1  |

|     |          |                                    |    |               |       |       |       |    |
|-----|----------|------------------------------------|----|---------------|-------|-------|-------|----|
| 474 | 868-77-9 | 2-Hydroxyethyl methacrylate        | 0  | N.A.          | 9.40  | 9.75  | 10.14 | 1  |
| 475 | 869-19-2 | <i>Glycylleucine</i>               | Z  | 5.5           | 8.43  | 9.04  | 9.01  | 1  |
| 476 | 873-62-1 | 3-Hydroxybenzotrile                | -1 | 10.5-<br>11.5 | 9.68  | 9.57  | 9.78  | 8  |
| 477 | 874-14-6 | 1,3-Dimethyluracil                 | 0  | N.A.          | 10.00 | 9.66  | 9.97  | 1  |
| 478 | 877-89-4 | 2,4,6-Trimethoxy-1,3,5-triazine    | 0  | 6             | 9.57  | 9.28  | 9.53  | 19 |
| 479 | 880-78-4 | Pentafluoronitrobenzene            | 0  | 7             | 10.64 | 11.20 | 10.51 | 27 |
| 480 | 882-09-7 | <i>Clofibrate</i>                  | -1 | 7             | 8.82  | 9.43  | 9.54  | 37 |
| 481 | 902-04-5 | 2'-Deoxyguanosine 5'-monophosphate | 0  | 6             | 10.26 | 9.34  | 9.49  | 1  |
| 482 | 917-95-3 | <i>2-Methyl-2-nitrosopropane</i>   | 0  | 9.2           | 9.79  | 10.53 | 10.40 | 1  |
| 483 | 918-00-3 | 1,1,1-Trichloroacetone             | 0  | N.A.          | 10.19 | 10.44 | 10.38 | 11 |
| 484 | 918-01-4 | Bromodichloronitromethane          | 0  | N.A.          | 10.43 | 10.33 | 10.33 | 28 |
| 485 | 924-16-3 | N-nitrosodibutylamine              | 0  | 7             | 10.19 | 9.66  | 9.94  | 4  |
| 486 | 924-50-5 | <i>Methyl 3-methylcrotonate</i>    | 0  | N.A.          | 9.74  | 9.70  | 10.06 | 17 |
| 487 | 926-79-4 | <i>Alanylalanylalanylalanine</i>   | Z  | 6.1           | 9.08  | 9.00  | 8.99  | 1  |
| 488 | 930-55-2 | <i>N-Nitrosopyrrolidine</i>        | 0  | 7             | 10.28 | 9.66  | 9.94  | 4  |
| 489 | 931-07-7 | 4-Nitroisothiazole                 | 0  | 7             | 10.52 | 10.69 | 10.53 | 1  |

|     |           |                                  |   |      |       |       |       |    |
|-----|-----------|----------------------------------|---|------|-------|-------|-------|----|
| 490 | 931-85-1  | <i>6-Azacytosine</i>             | 0 | 8    | 9.76  | 10.08 | 10.36 | 1  |
| 491 | 931-86-2  | <i>5-Azacytosine</i>             | 0 | 8    | 10.08 | 9.54  | 9.85  | 1  |
| 492 | 932-53-6  | <i>6-Azathymine</i>              | 0 | 8    | 9.98  | 10.12 | 10.40 | 1  |
| 493 | 932-83-2  | N-Nitrosohexamethyleneimine      | 0 | 7    | 10.19 | 9.68  | 9.96  | 4  |
| 494 | 932-90-1  | <i>Benzaldoxime</i>              | 0 | N.A. | 10.00 | 9.92  | 10.20 | 1  |
| 495 | 935-69-3  | <i>7-Methyladenine</i>           | 0 | N.A. | 10.11 | 9.59  | 9.85  | 1  |
| 496 | 937-40-6  | Methylbenzyl nitrosamine         | 0 | 7    | 10.26 | 9.71  | 10.01 | 4  |
| 497 | 943-39-5  | <i>4-Nitroperoxybenzoic acid</i> | 0 | 5    | 10.18 | 10.83 | 10.50 | 1  |
| 498 | 945-51-7  | <i>Diphenyl sulfoxide</i>        | 0 | 7    | 10.26 | 9.72  | 10.03 | 1  |
| 499 | 983-85-7  | Penamecillin                     | 0 | 6    | 10.65 | 9.62  | 9.93  | 1  |
| 500 | 1006-94-6 | <i>5-Methoxyindole</i>           | 0 | 7    | 8.85  | 9.34  | 9.48  | 1  |
| 501 | 1022-31-7 | N-Formylkynurenine               | Z | 7.6  | 10.30 | 10.52 | 10.44 | 1  |
| 502 | 1031-07-8 | Endosulfan sulfate               | 0 | N.A. | 10.53 | 10.15 | 10.24 | 38 |
| 503 | 1086-80-2 | Lumichrome                       | 0 | 6    | 10.41 | 10.76 | 10.43 | 1  |
| 504 | 1117-77-7 | N-Acetylglycine methyl ester     | 0 | 8.7  | 8.52  | 9.03  | 9.06  | 1  |
| 505 | 1121-89-7 | Glutarimide                      | 0 | N.A. | 9.85  | 9.48  | 9.79  | 39 |
| 506 | 1122-47-0 | <i>1-Methylcytosine</i>          | 0 | N.A. | 10.15 | 9.56  | 9.82  | 1  |

|     |           |                           |   |      |       |       |       |    |
|-----|-----------|---------------------------|---|------|-------|-------|-------|----|
| 507 | 1184-89-0 | Dibromochloronitromethane | 0 | 7    | 10.47 | 10.42 | 10.34 | 28 |
| 508 | 1188-01-8 | DL-Alanyl-Glycine         | Z | 6.22 | 8.32  | 9.03  | 8.98  | 1  |
| 509 | 1194-02-1 | 4-Fluorobenzonitrile      | 0 | 10   | 10.20 | 9.98  | 10.22 | 1  |
| 510 | 1445-08-5 | 2-Methyladenine           | 0 | 7    | 9.92  | 9.55  | 9.80  | 1  |
| 511 | 1453-82-3 | 4-Pyridinecarboxamide     | 0 | 9    | 10.51 | 10.03 | 10.35 | 1  |
| 512 | 1464-42-2 | <i>Selenomethionine</i>   | Z | N.A. | 8.26  | 8.88  | 8.74  | 1  |
| 513 | 1481-93-2 | 4-Chromanol               | 0 | 6.9  | 8.64  | 9.23  | 9.32  | 20 |
| 514 | 1622-61-3 | <i>Clonazepam</i>         | 0 | N.A. | 10.00 | 10.79 | 10.48 | 1  |
| 515 | 1634-04-4 | Methyl tert-butyl ether   | 0 | N.A. | 7.24  | 7.60  | 7.12  | 35 |
| 516 | 1794-84-9 | Chloronitromethane        | 0 | 7    | 10.48 | 10.49 | 10.50 | 28 |
| 517 | 1820-81-1 | 5-Chlorouracil            | 0 | 11   | 9.74  | 10.02 | 10.21 | 1  |
| 518 | 1912-24-9 | Atrazine                  | 0 | 6    | 9.68  | 9.54  | 9.77  | 40 |
| 519 | 1963-21-9 | Glycylvaline              | Z | 5.97 | 8.41  | 8.93  | 8.81  | 1  |
| 520 | 2004-03-7 | 6-Methylpurine            | 0 | 5.9  | 10.46 | 9.81  | 10.16 | 1  |
| 521 | 2043-43-8 | 2-Hydroxypropionamide     | 0 | 7    | 8.28  | 8.52  | 8.19  | 1  |
| 522 | 2140-65-0 | 1-Methylguanosine         | 0 | 9.2  | 9.89  | 9.34  | 9.49  | 1  |
| 523 | 2210-25-5 | N-Isopropylacrylamide     | 0 | 7    | 10.04 | 9.63  | 9.95  | 41 |

|     |           |                                          |    |      |       |       |       |    |
|-----|-----------|------------------------------------------|----|------|-------|-------|-------|----|
| 524 | 2236-60-4 | Pterin                                   | 0  | 6.5  | 10.40 | 10.38 | 10.42 | 1  |
| 525 | 2314-97-8 | <i>Trifluoroiodomethane</i>              | 0  | N.A. | 10.11 | 11.02 | 10.34 | 1  |
| 526 | 2365-48-2 | Methyl thioglycolate                     | -1 | 10   | 9.15  | 8.90  | 8.80  | 1  |
| 527 | 2489-13-6 | <i>GlyHis</i>                            | Z  | 7.6  | 8.79  | 9.03  | 8.99  | 1  |
| 528 | 2577-40-4 | <i>L-Phenylalanyl-L-phenylalanine</i>    | Z  | 5.7  | 8.65  | 9.51  | 9.74  | 1  |
| 529 | 2578-57-6 | ProGly                                   | -1 | 6.2  | 8.98  | 8.55  | 8.20  | 1  |
| 530 | 2620-63-5 | N-Acetylglycinamide                      | 0  | 9.2  | 8.32  | 8.73  | 8.52  | 1  |
| 531 | 2680-03-7 | N,N-Dimethylacrylamide                   | 0  | 9.2  | 10.20 | 9.70  | 10.01 | 1  |
| 532 | 2721-32-6 | 2,3-Diazabicyclo[2.2.1]hept-2-ene        | 0  | N.A. | 10.36 | 9.78  | 10.09 | 1  |
| 533 | 2816-24-2 | $\alpha$ -Nitrophenyl--D-glucopyranoside | 0  | N.A. | 10.40 | 10.72 | 10.47 | 1  |
| 534 | 2845-89-8 | 3-Chloroanisole                          | 0  | N.A. | 8.97  | 9.43  | 9.55  | 1  |
| 535 | 2867-20-1 | <i>Alanylalanine</i>                     | Z  | 6.2  | 8.43  | 9.03  | 8.99  | 1  |
| 536 | 2935-35-5 | L-Phenylglycine                          | 0  | N.A. | 8.95  | 9.32  | 9.53  | 42 |
| 537 | 3012-37-1 | <i>Benzyl thiocyanate</i>                | 0  | N.A. | 9.30  | 9.81  | 10.17 | 1  |
| 538 | 3034-38-6 | 4-Nitroimidazole                         | 0  | 7    | 10.49 | 10.49 | 10.50 | 1  |
| 539 | 3034-48-8 | 2-Bromo-5-nitrothiazole                  | 0  | 7    | 10.30 | 10.39 | 10.43 | 1  |
| 540 | 3085-42-5 | Di(4-chlorophenyl) sulfoxide             | 0  | 7    | 10.00 | 9.98  | 10.17 | 1  |

|     |           |                                          |    |      |       |       |       |    |
|-----|-----------|------------------------------------------|----|------|-------|-------|-------|----|
| 541 | 3270-71-1 | Furamazone                               | 0  | 7    | 10.52 | 11.02 | 10.40 | 1  |
| 542 | 3321-03-7 | Glycylphenylalanine                      | Z  | 6.7  | 8.20  | 9.17  | 9.22  | 1  |
| 543 | 3376-24-7 | N-tert-Butyl--phenylnitron               | 0  | N.A. | 10.18 | 10.04 | 10.23 | 1  |
| 544 | 3615-55-2 | Ribose-5-phosphate                       | 0  | N.A. | 8.90  | 9.74  | 10.10 | 1  |
| 545 | 3617-44-5 | Phenylalanine                            | Z  | 6.9  | 8.20  | 9.30  | 9.45  | 1  |
| 546 | 3695-73-6 | <i>Glycyl-<math>\beta</math>-alanine</i> | Z  | 6.2  | 8.46  | 9.04  | 9.00  | 1  |
| 547 | 3964-56-5 | 4-Bromo-2-chlorophenol                   | 0  | 5    | 9.95  | 9.85  | 9.89  | 1  |
| 548 | 4164-28-7 | Dimethylnitramine                        | 0  | N.A. | 10.28 | 9.65  | 10.03 | 43 |
| 549 | 4202-74-8 | Glycine anhydride                        | 0  | 9.2  | 9.23  | 9.67  | 10.00 | 1  |
| 550 | 4306-24-5 | GlyLeuTyr                                | Z  | 6.1  | 8.96  | 9.17  | 9.22  | 1  |
| 551 | 4533-39-5 | Nitracrine                               | 0  | 7    | 10.65 | 11.00 | 10.32 | 1  |
| 552 | 4549-44-4 | N-Nitrosoethylbutylamine                 | 0  | 7    | 10.19 | 9.66  | 9.95  | 4  |
| 553 | 4697-36-3 | Carbenicillin                            | -2 | 6    | 9.04  | 9.20  | 9.27  | 1  |
| 554 | 5076-82-4 | Sarcosine anhydride                      | 0  | 9.2  | 9.30  | 8.74  | 8.53  | 1  |
| 555 | 5257-06-7 | <i>N-(2-Acetylphenyl)formamide</i>       | 0  | 7.6  | 10.26 | 10.17 | 10.38 | 1  |
| 556 | 5327-44-6 | 3,5-Dinitroanisole                       | 0  | N.A. | 10.62 | 10.93 | 10.44 | 1  |
| 557 | 5424-19-1 | <i>3-Benzoylpyridine</i>                 | 0  | 9    | 10.48 | 10.36 | 10.47 | 1  |

|     |           |                                  |    |      |       |       |       |    |
|-----|-----------|----------------------------------|----|------|-------|-------|-------|----|
| 558 | 5502-78-3 | 9-Methylguanine                  | 0  | 6    | 9.88  | 9.49  | 9.71  | 1  |
| 559 | 5625-46-7 | Alanine anhydride                | 0  | 9.2  | 9.30  | 8.78  | 8.61  | 1  |
| 560 | 5874-90-8 | Alanylalanylalanine              | Z  | 6    | 8.69  | 9.26  | 9.35  | 1  |
| 561 | 5875-24-1 | 3-Chloropropionamide             | 0  | 6    | 9.26  | 8.81  | 8.70  | 1  |
| 562 | 5919-26-6 | 2-Nitropyrrole                   | 0  | 7    | 10.45 | 10.55 | 10.46 | 1  |
| 563 | 5930-94-9 | 3-Nitropyrrole                   | 0  | 7    | 10.52 | 10.41 | 10.44 | 1  |
| 564 | 6290-49-9 | Methyl methoxyacetate            | 0  | 7    | 8.64  | 8.84  | 8.76  | 1  |
| 565 | 6359-38-2 | Benzoflavine                     | 0  | 6.5  | 10.51 | 10.29 | 10.29 | 1  |
| 566 | 6559-91-7 | 4'-Demethylepipodophyllotoxin    | 0  | N.A. | 9.52  | 9.37  | 9.53  | 44 |
| 567 | 6622-92-0 | 2,4-Dimethyl-6-hydroxypyrimidine | 0  | 6    | 10.11 | 9.47  | 9.77  | 34 |
| 568 | 6976-37-0 | Bistris                          | 0  | N.A. | 7.48  | 7.92  | 7.46  | 1  |
| 569 | 7004-12-8 | Arginine                         | -1 | 11.5 | 7.70  | 8.06  | 7.61  | 1  |
| 570 | 7093-67-6 | Glycylglycylglycylglycylglycine  | Z  | 6    | 9.28  | 9.24  | 9.34  | 1  |
| 571 | 7119-89-3 | Dichloronitromethane             | 0  | 7    | 10.51 | 10.96 | 10.46 | 45 |
| 572 | 7119-92-8 | Diethylnitramine                 | 0  | N.A. | 10.25 | 9.67  | 10.05 | 43 |
| 573 | 7298-84-2 | LeuAla                           | Z  | 6.1  | 8.23  | 9.14  | 9.17  | 1  |
| 574 | 7314-30-9 | Dimethyl- $\beta$ -propiothietin | 0  | N.A. | 9.60  | 9.19  | 9.25  | 1  |

|     |            |                                                    |   |      |       |       |       |    |
|-----|------------|----------------------------------------------------|---|------|-------|-------|-------|----|
| 575 | 7412-78-4  | Glycyl-L-glutamate                                 | Z | 5.7  | 8.34  | 9.36  | 9.51  | 1  |
| 576 | 7535-48-0  | 4',5'-Dihydropsoralen                              | 0 | N.A. | 10.26 | 10.20 | 10.33 | 1  |
| 577 | 10236-47-2 | <i>Naringin</i>                                    | 0 | 6.9  | 10.00 | 9.99  | 10.23 | 20 |
| 578 | 10373-78-1 | Camphoroquinone                                    | 0 | 7    | 10.45 | 10.56 | 10.43 | 1  |
| 579 | 10595-95-6 | <i>Methylethylnitrosamine</i>                      | 0 | 7    | 10.22 | 9.58  | 9.84  | 43 |
| 580 | 13551-87-6 | Misonidazole                                       | 0 | N.A. | 10.48 | 10.72 | 10.48 | 1  |
| 581 | 13621-50-6 | Dehydromethionine                                  | 0 | 5    | 9.94  | 9.87  | 10.16 | 1  |
| 582 | 13838-16-9 | 2-Chloro-1,1,2-trifluoro-1-(difluoromethoxy)ethane | 0 | 7    | 9.43  | 9.39  | 9.74  | 1  |
| 583 | 14548-46-0 | 4-Benzoylpyridine                                  | 0 | 9    | 10.45 | 10.44 | 10.48 | 1  |
| 584 | 14684-48-1 | 1,3-Dimethylalumichrome                            | 0 | N.A. | 10.46 | 10.72 | 10.43 | 1  |
| 585 | 17576-53-3 | 3-Nitroquinoline                                   | 0 | 7    | 10.60 | 10.86 | 10.45 | 1  |
| 586 | 17639-93-9 | Methyl 2-chloropropionate                          | 0 | N.A. | 10.08 | 9.56  | 9.88  | 1  |
| 587 | 19729-30-7 | GlyGlyAla                                          | Z | 6.1  | 8.93  | 9.22  | 9.30  | 1  |
| 588 | 20138-79-8 | 2,1,3-Benzothiadiazole-4,7-dicarbonitrile          | 0 | N.A. | 10.26 | 11.21 | 10.41 | 1  |
| 589 | 20461-60-3 | 2,4-Diethoxypyrimidine                             | 0 | 7    | 9.45  | 9.47  | 9.72  | 1  |



|     |            |                                        |    |      |       |       |       |    |
|-----|------------|----------------------------------------|----|------|-------|-------|-------|----|
| 590 | 20689-96-7 | Ethylbenzyl nitrosamine                | 0  | 7    | 10.26 | 9.77  | 10.07 | 4  |
| 591 | 20830-81-3 | Daunomycin                             | 0  | 7    | 10.20 | 11.06 | 10.35 | 1  |
| 592 | 20902-45-8 | D-Penicillamine disulfide              | 0  | 7    | 9.80  | 9.62  | 9.91  | 1  |
| 593 | 21911-69-3 | <i>P-Tolylamino-acetic acid</i>        | 0  | 3.9  | 9.30  | 9.23  | 9.31  | 1  |
| 594 | 21967-41-9 | <i>Baicalin</i>                        | -1 | 6.9  | 10.11 | 10.24 | 10.31 | 20 |
| 595 | 23350-58-5 | Crotonamide                            | 0  | 9.2  | 10.11 | 9.51  | 9.81  | 1  |
| 596 | 23576-42-3 | <i>L-Phenylalanylglycylglycine</i>     | Z  | 6.6  | 9.04  | 9.53  | 9.76  | 1  |
| 597 | 24686-78-0 | 1,2,3,5-Tetramethylisoindole-4,7-dione | 0  | 7    | 10.38 | 9.60  | 9.90  | 1  |
| 598 | 25005-95-2 | 2,3-Bis(2-pyridyl)-5,6-dihydropyrazine | 0  | N.A. | 10.38 | 10.43 | 10.43 | 1  |
| 599 | 25005-96-3 | 2,3-Bis(2-pyridyl)pyrazine             | 0  | N.A. | 10.38 | 10.13 | 10.37 | 1  |
| 600 | 25812-30-0 | Gemfibrozil                            | -1 | 7    | 8.80  | 9.13  | 9.15  | 37 |
| 601 | 26305-13-5 | 5,6-Dimethyluracil                     | 0  | 12   | 9.23  | 9.61  | 9.90  | 34 |
| 602 | 26621-44-3 | 3-Nitropyrazole                        | 0  | 7    | 10.54 | 10.56 | 10.52 | 1  |
| 603 | 26638-03-9 | Methoxyphenol                          | 0  | 6.9  | 9.23  | 9.05  | 9.01  | 1  |
| 604 | 26787-78-0 | Amoxicillin                            | Z  | 7    | 9.54  | 9.52  | 9.75  | 46 |

|     |            |                                            |   |      |       |       |       |    |
|-----|------------|--------------------------------------------|---|------|-------|-------|-------|----|
| 605 | 27032-78-6 | <i>2,4-Dioxohexahydro-1,3,5-triazine</i>   | 0 | 6    | 8.03  | 8.83  | 8.73  | 19 |
| 606 | 27318-90-7 | <i>1,10-Phenanthroline-5,6-dione</i>       | 0 | N.A. | 10.51 | 11.22 | 10.40 | 1  |
| 607 | 27816-36-0 | 2-Chloropropionamide                       | 0 | 6    | 9.76  | 8.97  | 8.95  | 1  |
| 608 | 29816-01-1 | Glycylsarcosine                            | Z | 6.4  | 8.84  | 9.06  | 9.03  | 1  |
| 609 | 33094-66-5 | <i>2-Nitrobenzofuran</i>                   | 0 | 7    | 10.30 | 10.88 | 10.44 | 1  |
| 610 | 33419-42-0 | Etoposide                                  | 0 | 7    | 9.43  | 9.39  | 9.56  | 44 |
| 611 | 33577-16-1 | <i>Methyl methylsulfinylmethyl sulfide</i> | 0 | N.A. | 8.11  | 8.73  | 8.49  | 1  |
| 612 | 34671-83-5 | 2,2'-Bipyrimidine                          | 0 | 7    | 10.32 | 10.26 | 10.42 | 1  |
| 613 | 34841-39-9 | <i>Bupropion</i>                           | 0 | N.A. | 10.44 | 10.31 | 10.37 | 47 |
| 614 | 37350-58-6 | <i>Metoprolol</i>                          | 0 | N.A. | 8.24  | 9.20  | 9.27  | 48 |
| 615 | 40024-32-6 | 5-Hydroxy-2-nitrobenzofuran                | 0 | 7    | 10.30 | 10.90 | 10.40 | 1  |
| 616 | 40497-30-1 | 4,6-Dihydroxy-2-methylpyrimidine           | 0 | 4.5  | 9.73  | 9.35  | 9.58  | 34 |
| 617 | 40739-73-9 | 7-Hydroxy-2-nitrobenzofuran                | 0 | 7    | 10.30 | 10.91 | 10.40 | 1  |
| 618 | 42538-53-4 | Glycylglycyl- $\beta$ -alanine             | Z | 5.5  | 9.15  | 9.29  | 9.40  | 1  |
| 619 | 42978-66-5 | Tri(propylene glycol) diacrylate           | 0 | N.A. | 9.46  | 9.90  | 10.23 | 49 |
| 620 | 51209-75-7 | S-Nitroso-L-cysteine                       | Z | 7    | 10.38 | 10.71 | 10.44 | 50 |

|     |            |                                       |    |      |       |       |       |    |
|-----|------------|---------------------------------------|----|------|-------|-------|-------|----|
| 621 | 54261-98-2 | Stachyose                             | 0  | 7    | 7.94  | 8.24  | 7.77  | 1  |
| 622 | 55520-40-6 | Tyrosine                              | Z  | 6.6  | 8.45  | 9.33  | 9.48  | 1  |
| 623 | 55627-73-1 | 8-Bromoinosine                        | 0  | 7    | 10.23 | 9.27  | 10.10 | 51 |
| 624 | 61276-17-3 | Verbascoside                          | 0  | N.A. | 9.79  | 10.30 | 10.35 | 1  |
| 625 | 61696-29-5 | 5-Deazalumiflavin                     | 0  | 7    | 10.53 | 10.65 | 10.41 | 1  |
| 626 | 63762-74-3 | <i>6-Chloromelatonin</i>              | 0  | N.A. | 9.65  | 9.52  | 9.69  | 52 |
| 627 | 65222-35-7 | Pazelliptine                          | 0  | 7    | 10.20 | 10.12 | 10.24 | 1  |
| 628 | 66108-95-0 | Iohexol                               | 0  | N.A. | 10.53 | 10.46 | 10.45 | 21 |
| 629 | 70402-14-1 | 6-Aminophenalenone                    | 0  | 11   | 10.38 | 10.68 | 10.34 | 1  |
| 630 | 71628-96-1 | <i>7-O-Methylnogarol</i>              | 0  | N.A. | 10.54 | 10.77 | 10.38 | 1  |
| 631 | 72558-82-8 | Ceftazidime                           | 0  | N.A. | 10.00 | 10.64 | 10.39 | 1  |
| 632 | 73334-07-3 | Iopromide                             | 0  | N.A. | 10.51 | 10.50 | 10.46 | 21 |
| 633 | 79637-11-9 | Styrene                               | 0  | 12.7 | 10.04 | 9.74  | 10.03 | 23 |
| 634 | 79731-35-4 | Glycylaspartate                       | -1 | 5.8  | 8.58  | 8.87  | 8.71  | 1  |
| 635 | 85721-33-1 | Ciprofloxacin                         | 0  | N.A. | 10.42 | 10.04 | 10.19 | 53 |
| 636 | 88191-48-4 | Catechin                              | 0  | 6.9  | 8.08  | 9.23  | 9.31  | 20 |
| 637 | 88283-41-4 | $\alpha$ -(3-Pyridyl 1-oxide)-N-tert- | 0  | N.A. | 10.40 | 10.01 | 10.22 | 1  |

| butylnitron |             |                                                                               |    |      |       |       |       |    |
|-------------|-------------|-------------------------------------------------------------------------------|----|------|-------|-------|-------|----|
| 638         | 90332-86-8  | Guanidine                                                                     | 0  | 11.9 | 8.20  | 8.04  | 7.53  | 1  |
| 639         | 93413-69-5  | Venlafaxine                                                                   | 0  | N.A. | 8.66  | 9.22  | 9.29  | 1  |
| 640         | 93839-87-3  | <i>Adenylyl-(2'5')uridine phosphate</i>                                       | 0  | 9.2  | 9.30  | 9.79  | 10.07 | 1  |
| 641         | 113617-63-3 | Orbifloxacin                                                                  | 0  | NA   | 10.40 | 10.10 | 10.22 | 54 |
| 642         | 116333-41-6 | 5'-(1,4-Dihydro-1-methyl-3-pyridinylcarbonyl)-3'-azido-2',2'-dideoxythymidine | 0  | N.A. | 10.00 | 9.93  | 10.13 | 1  |
| 643         | 116539-59-4 | Duloxetine                                                                    | 0  | N.A. | 10.33 | 9.89  | 10.15 | 52 |
| 644         | 135531-25-8 | <i>Bromochloronitromethane</i>                                                | 0  | 7    | 10.47 | 10.99 | 10.47 | 28 |
| 645         | 152971-80-7 | <i>S-Nitroso-N-acetyl-D,L-penicillamine</i>                                   | -1 | 7    | 10.54 | 10.63 | 10.37 | 51 |

Note: 1) Compounds names in italics are present in the validation set. 2) N.A.: not available. 3) Z: zwitterion

**Table A2.** Information for outliers in the SVM-based model.

| No. | CAS        | Name                           | $\delta$ (SVM) |
|-----|------------|--------------------------------|----------------|
| 200 | 100-46-9   | Benzenemethanamine             | -3.24          |
| 333 | 366-29-0   | N,N,N',N'-Tetramethylbenzidine | -3.43          |
| 384 | 542-59-6   | 2-Hydroxyethyl acetate         | -3.37          |
| 544 | 3615-55-2  | Ribose-5-phosphate             | -3.16          |
| 545 | 3617-44-5  | Phenylalanine                  | -3.31          |
| 575 | 7412-78-4  | L-glutamate                    | -3.09          |
| 636 | 88191-48-4 | Catechin                       | -3.26          |

**Table A3.** Compounds with  $h > h^*$  and  $|\delta| < 3$  in the MLR- and SVM-based models

| No. | CAS     | Name                           | $\delta$ (MLR) | $\delta$ (SVM) | $h$   |
|-----|---------|--------------------------------|----------------|----------------|-------|
| 21  | 56-23-5 | Carbon tetrachloride           | -1.94          | -0.33          | 0.074 |
| 59  | 67-66-3 | Trichloromethane               | 0.37           | 0.33           | 0.040 |
| 77  | 74-96-4 | Ethyl bromide                  | 0.74           | 0.09           | 0.054 |
| 87  | 75-25-2 | Bromoform                      | -0.85          | -0.34          | 0.058 |
| 91  | 75-45-6 | Chlorodifluoromethane          | 0.21           | -0.33          | 0.042 |
| 93  | 75-63-8 | Bromotrifluoromethane          | 0.21           | 0.34           | 0.076 |
| 95  | 75-69-4 | Trichlorofluoromethane         | -1.03          | -0.07          | 0.073 |
| 96  | 75-71-8 | Dichlorodifluoromethane        | -0.49          | 0.07           | 0.072 |
| 97  | 75-72-9 | Chlorotrifluoromethane         | -0.21          | 0.10           | 0.074 |
| 99  | 76-13-1 | 1,1,2-Trichlorotrifluoroethane | -0.53          | -0.13          | 0.063 |
| 104 | 78-76-2 | 2-Bromobutane                  | 0.28           | -0.16          | 0.083 |

|     |            |                           |       |       |       |
|-----|------------|---------------------------|-------|-------|-------|
| 117 | 79-27-6    | 1,1,2,2-Tetrabromoethane  | 0.10  | -0.06 | 0.033 |
| 220 | 106-41-2   | 4-Bromophenolate          | -0.53 | -0.16 | 0.081 |
| 227 | 106-94-5   | 1-Bromopropane            | 1.07  | 0.49  | 0.048 |
| 258 | 109-65-9   | 1-Bromobutane             | 1.03  | 0.44  | 0.047 |
| 267 | 110-53-2   | 1-Bromopentane            | 0.95  | 0.35  | 0.047 |
| 295 | 127-18-4   | Tetrachloroethylene       | 0.30  | 0.16  | 0.051 |
| 350 | 464-10-8   | Tribromonitromethane      | -0.12 | 0.04  | 0.119 |
| 367 | 507-19-7   | 2-Bromo-2-methylpropane   | -0.21 | -0.35 | 0.112 |
| 379 | 540-51-2   | 2-Bromoethanol            | -0.57 | -1.37 | 0.030 |
| 405 | 591-20-8   | 3-Bromophenolate          | -0.48 | -0.20 | 0.072 |
| 484 | 918-01-4   | Bromodichloronitromethane | 0.21  | 0.26  | 0.126 |
| 507 | 1184-89-0  | Dibromochloronitromethane | 0.10  | 0.34  | 0.113 |
| 525 | 2314-97-8  | Trifluoroiodomethane      | -1.66 | -0.42 | 0.075 |
| 539 | 3034-48-8  | 2-Bromo-5-nitrothiazole   | -0.20 | -0.34 | 0.078 |
| 623 | 55627-73-1 | 8-Bromoinosine            | 2.13  | 0.34  | 0.059 |

---

**Table A4.** List of experimental and predicted  $\log k_{\text{eq}}$  by the current MLR model and previous phenyl-based compounds MLR model for some new classes of compounds, as well as deviation ( $\log k_{\text{pre}} / \log k_{\text{exp}}$ ) between the predicted  $\log k_{\text{eq}}$  and experimental ones.

| Name                | CAS     | $\log k_{\text{eq}}$ |               |                                        | Deviation     |                                        |
|---------------------|---------|----------------------|---------------|----------------------------------------|---------------|----------------------------------------|
|                     |         | Experimental         | Current model | *Previous phenyl-based compounds model | Current model | *Previous phenyl-based compounds model |
| Benzo[a]pyrene      | 50-32-8 | 9.78                 | 10.42         | 10.29                                  | 1.07          | 1.05                                   |
| Cephaloridine       | 50-59-9 | 10.45                | 10.67         | 11.36                                  | 1.02          | 1.09                                   |
| 6-Azauridine        | 54-25-1 | 9.88                 | 10.26         | 10.13                                  | 1.04          | 1.03                                   |
| Pyridoxal phosphate | 54-47-7 | 10.20                | 10.51         | 11.24                                  | 1.03          | 1.10                                   |
| Ethynyl estradiol   | 57-63-6 | 8.16                 | 9.17          | 8.82                                   | 1.12          | 1.08                                   |
| Sulfaguanidine      | 57-67-0 | 9.93                 | 9.56          | 9.66                                   | 0.96          | 0.97                                   |
| Caffeine            | 58-08-2 | 10.08                | 9.65          | 9.39                                   | 0.96          | 0.93                                   |
| Theophylline        | 58-55-9 | 9.00                 | 9.45          | 9.41                                   | 1.05          | 1.05                                   |
| Adenosine           | 58-61-7 | 10.08                | 9.55          | 9.35                                   | 0.95          | 0.93                                   |
| Inosine             | 58-63-9 | 9.99                 | 9.68          | 9.78                                   | 0.97          | 0.98                                   |
| 6-Hydroxypurine     | 68-94-0 | 9.98                 | 9.60          | 9.63                                   | 0.96          | 0.96                                   |

|                                 |          |       |       |      |      |      |
|---------------------------------|----------|-------|-------|------|------|------|
| 2,6-Dihydroxypurine             | 69-89-6  | 9.59  | 9.72  | 9.72 | 1.01 | 1.01 |
| Uric acid                       | 69-93-2  | 9.78  | 9.58  | 9.60 | 0.98 | 0.98 |
| 5-Azauracil                     | 71-33-0  | 9.45  | 9.85  | 9.90 | 1.04 | 1.05 |
| Adenine                         | 73-24-5  | 9.04  | 9.59  | 9.62 | 1.06 | 1.06 |
| Guanine                         | 73-40-5  | 10.15 | 9.56  | 9.37 | 0.94 | 0.92 |
| Camphor                         | 76-22-2  | 9.49  | 9.30  | 8.63 | 0.98 | 0.91 |
| Theobromine                     | 83-67-0  | 9.34  | 9.68  | 9.48 | 1.04 | 1.01 |
| Guanosine<br>monophosphate      | 85-32-5  | 9.49  | 9.37  | 9.63 | 0.99 | 1.01 |
| 2-<br>(Chloromercuri)phen<br>ol | 90-03-9  | 10.04 | 9.94  | 9.73 | 0.99 | 0.97 |
| Benzotriazole                   | 95-14-7  | 9.23  | 10.05 | 9.64 | 1.09 | 1.04 |
| N-Nitrosopiperidine             | 100-75-4 | 10.24 | 9.66  | 9.03 | 0.94 | 0.88 |
| Cyanuricacid                    | 108-80-5 | 9.15  | 9.14  | 9.14 | 1.00 | 1.00 |
| Guanosine                       | 118-00-3 | 9.78  | 9.36  | 9.51 | 0.96 | 0.97 |
| Purine                          | 120-73-0 | 10.32 | 9.90  | 9.80 | 0.96 | 0.95 |
| Quinine                         | 130-95-0 | 10.23 | 10.11 | 9.85 | 0.99 | 0.96 |



|                                     |          |       |       |       |             |      |
|-------------------------------------|----------|-------|-------|-------|-------------|------|
| Sulfamethizole                      | 144-82-1 | 10.30 | 8.98  | 10.03 | <u>0.87</u> | 0.97 |
| Phthalazine                         | 253-52-1 | 10.54 | 10.18 | 10.00 | 0.97        | 0.95 |
| Pyridazine                          | 289-80-5 | 10.34 | 9.99  | 9.60  | 0.97        | 0.93 |
| 1,3,5-Triazine                      | 290-87-9 | 9.72  | 9.95  | 9.60  | 1.02        | 0.99 |
| 6-Azauracil                         | 461-89-2 | 9.66  | 10.22 | 10.07 | 1.06        | 1.04 |
| Ascaridole                          | 512-85-6 | 9.60  | 9.10  | 8.48  | 0.95        | 0.88 |
| Nifuroxime                          | 555-15-7 | 10.58 | 10.93 | 10.90 | 1.03        | 1.03 |
| 7-Methylguanine                     | 578-76-7 | 10.20 | 9.55  | 9.26  | 0.94        | 0.91 |
| 2-Nitrothiophene                    | 609-40-5 | 10.48 | 10.77 | 10.74 | 1.03        | 1.02 |
| Benzoic hydrazide                   | 613-94-5 | 10.19 | 9.63  | 9.32  | 0.95        | 0.91 |
| 3-Nitrothiophene                    | 822-84-4 | 10.52 | 10.62 | 10.56 | 1.01        | 1.00 |
| 2,4,6-Trimethoxy-<br>1,3,5-triazine | 877-89-4 | 9.57  | 9.28  | 9.06  | 0.97        | 0.95 |
| 4-Nitroisothiazole                  | 931-07-7 | 10.52 | 10.69 | 10.76 | 1.02        | 1.02 |
| 5-Azacytosine                       | 931-86-2 | 10.08 | 9.54  | 9.40  | 0.95        | 0.93 |
| 6-Azathymine                        | 932-53-6 | 9.98  | 10.12 | 9.80  | 1.01        | 0.98 |
| Benzaldoxime                        | 932-90-1 | 10.00 | 9.92  | 9.37  | 0.99        | 0.94 |

|                                                          |             |       |       |       |      |      |
|----------------------------------------------------------|-------------|-------|-------|-------|------|------|
| 7-Methyladenine                                          | 935-69-3    | 10.11 | 9.59  | 9.52  | 0.95 | 0.94 |
| Glutarimide                                              | 1121-89-7   | 9.85  | 9.56  | 9.02  | 0.97 | 0.92 |
| 2-Methyladenine                                          | 1445-08-5   | 9.92  | 9.55  | 9.46  | 0.96 | 0.95 |
| Atrazine                                                 | 1912-24-9   | 9.68  | 9.54  | 9.27  | 0.99 | 0.96 |
| Di(4-chlorophenyl)<br>sulfoxide                          | 3085-42-5   | 10.00 | 9.98  | 9.92  | 1.00 | 0.99 |
| 9-Methylguanine                                          | 5502-78-3   | 9.88  | 9.49  | 9.28  | 0.96 | 0.94 |
| Alanine anhydride                                        | 5625-46-7   | 9.30  | 8.78  | 8.32  | 0.94 | 0.89 |
| 3-Nitropyrazole                                          | 26621-44-3  | 10.54 | 10.56 | 10.59 | 1.00 | 1.00 |
| 2,4-Dioxohexahydro-<br>1,3,5-triazine                    | 27032-78-6  | 8.03  | 8.83  | 8.73  | 1.10 | 1.09 |
| $\alpha$ -(3-Pyridyl 1-<br>oxide)-N-tert-<br>butylnitron | 88283-41-4  | 10.40 | 10.01 | 9.87  | 0.96 | 0.95 |
| Duloxetine                                               | 116539-59-4 | 10.33 | 9.89  | 9.63  | 0.96 | 0.93 |

---

\* This model is from the research of Li et al. (*Water Res.*, 2019, 151, 468-477).

**Table A5.** List of experimental and predicted  $\log k_{\text{eq}}$  by the current MLR model and previous aliphatic compounds MLR model for some new classes of compounds, as well as deviation ( $\log k_{\text{pre}} / \log k_{\text{exp}}$ ) between the predicted  $\log k_{\text{eq}}$  and experimental ones.

| Name                            | CAS      | $\log k_{\text{eq}}$ |               |                                     | Deviation     |                                     |
|---------------------------------|----------|----------------------|---------------|-------------------------------------|---------------|-------------------------------------|
|                                 |          | Experimental         | Current model | *Previous aliphatic compounds model | Current model | *Previous aliphatic compounds model |
| Cystamine                       | 51-85-4  | 10.26                | 9.47          | 10.40                               | 0.92          | 1.01                                |
| Busulfan                        | 55-98-1  | 7.48                 | 7.90          | 9.66                                | 1.06          | 1.29                                |
| Tetraethylthiuram disulfide     | 97-77-8  | 10.04                | 10.23         | 13.04                               | 1.02          | 1.30                                |
| Cyclohexyl methacrylate         | 101-43-9 | 9.30                 | 9.71          | 9.93                                | 1.04          | 1.07                                |
| 1,3-Diethyl-2-thiourea          | 105-55-5 | 8.70                 | 9.03          | 9.31                                | 1.04          | 1.07                                |
| Acetaldoxime                    | 107-29-9 | 7.86                 | 8.93          | 8.50                                | 1.14          | 1.08                                |
| Bis(1,1-dimethylethyl) peroxide | 110-05-4 | 8.15                 | 8.50          | 9.61                                | 1.04          | 1.18                                |
| Diacetyl peroxide               | 110-22-5 | 9.98                 | 9.13          | 10.48                               | 0.91          | 1.05                                |
| Trioxane                        | 110-88-3 | 6.00                 | 7.20          | 6.88                                | 1.20          | 1.15                                |
| Cyclopentanone                  | 120-92-3 | 9.87                 | 9.36          | 9.18                                | 0.95          | 0.93                                |
| Acetone oxime                   | 127-06-0 | 8.54                 | 8.82          | 8.55                                | 1.03          | 1.00                                |

|                                   |           |       |       |       |      |      |
|-----------------------------------|-----------|-------|-------|-------|------|------|
| Cycloheptatriene                  | 544-25-2  | 9.78  | 9.72  | 9.71  | 0.99 | 0.99 |
| 1,3-Cyclohexadiene                | 592-57-4  | 9.00  | 9.52  | 9.29  | 1.06 | 1.03 |
| Methylphenyl nitrosamine          | 614-00-6  | 10.36 | 9.93  | 10.40 | 0.96 | 1.00 |
| Dibenzyl sulfoxide                | 621-08-9  | 9.54  | 9.48  | 11.25 | 0.99 | 1.18 |
| N-Nitrosodipropylamine            | 621-64-7  | 10.18 | 9.67  | 9.85  | 0.95 | 0.97 |
| Diethyl methylphosphonate         | 683-08-9  | 7.53  | 7.68  | 8.49  | 1.02 | 1.13 |
| 2-Methyl-2-nitrosopropane         | 917-95-3  | 9.79  | 10.53 | 10.11 | 1.08 | 1.03 |
| N-nitrosodibutylamine             | 924-16-3  | 10.19 | 9.66  | 10.17 | 0.95 | 1.00 |
| N-Nitrosohexamethyleneimine       | 932-83-2  | 10.19 | 9.68  | 9.85  | 0.95 | 0.97 |
| Endosulfan sulfate                | 1031-07-8 | 10.53 | 10.15 | 12.14 | 0.96 | 1.15 |
| 2,3-Diazabicyclo[2.2.1]hept-2-ene | 2721-32-6 | 10.36 | 9.78  | 9.74  | 0.94 | 0.94 |
| Ribose-5-phosphate                | 3615-55-2 | 8.90  | 9.74  | 10.59 | 1.09 | 1.19 |
| Dimethylnitramine                 | 4164-28-7 | 10.28 | 9.65  | 9.69  | 0.94 | 0.94 |
| N-Nitrosoethylbutylamine          | 4549-44-4 | 10.19 | 9.66  | 9.85  | 0.95 | 0.97 |
| Arginine                          | 7004-12-8 | 7.70  | 8.06  | 8.60  | 1.05 | 1.12 |

|                                      |            |       |      |       |      |      |
|--------------------------------------|------------|-------|------|-------|------|------|
| Diethylnitramine                     | 7119-92-8  | 10.25 | 9.67 | 9.72  | 0.94 | 0.95 |
| Methylethylnitrosamine               | 10595-95-6 | 10.22 | 9.58 | 9.40  | 0.94 | 0.92 |
| D-Penicillamine disulfide            | 20902-45-8 | 9.80  | 9.62 | 11.74 | 0.98 | 1.20 |
| Methyl methylthiomethyl<br>sulfoxide | 33577-16-1 | 8.11  | 8.73 | 9.21  | 1.08 | 1.13 |
| Guanidine                            | 90332-86-8 | 8.20  | 8.04 | 8.16  | 0.98 | 0.99 |

---

\* This model is from the research of Li et al. (*Water Res.*, 2019, 151, 468-477).

**Table A6.** Comparison of prediction accuracy of different models for some new compounds classes in Table A4 and A5.

| Statistics  | Phenyl-containing compounds and heterocycles |                                        | Aliphatic compounds |                                     |
|-------------|----------------------------------------------|----------------------------------------|---------------------|-------------------------------------|
|             | Current model                                | *Previous phenyl-based compounds model | Current model       | *Previous aliphatic compounds model |
|             | <i>MSE</i>                                   | 0.210                                  | 0.334               | 0.319                               |
| <i>RMSE</i> | 0.458                                        | 0.578                                  | 0.565               | 1.075                               |
| <i>MAE</i>  | 0.385                                        | 0.495                                  | 0.497               | 0.806                               |

\* This model is from the research of Li et al. (*Water Res.*, 2019, 151, 468-477).

**Table A7.** Classification of organic compounds based on different functional groups.

| Group             | Compounds                                                                                                                                                                                                                                                                                                                                                                                                                                                                                                                                                                                                                                                                                                                                                           |
|-------------------|---------------------------------------------------------------------------------------------------------------------------------------------------------------------------------------------------------------------------------------------------------------------------------------------------------------------------------------------------------------------------------------------------------------------------------------------------------------------------------------------------------------------------------------------------------------------------------------------------------------------------------------------------------------------------------------------------------------------------------------------------------------------|
| -COO <sup>-</sup> | 2-Hydroxypropionate (50-21-5), 4-Methyl-salicylate (50-85-1), Hydroxyprolin (51-35-4), Pyridoxal phosphate (54-47-7), Folate (59-30-3), Methicillin (61-32-5), Penicillin G (61-33-6), Cloxacillin (61-72-3), Cytidylate (63-37-6), Ampicillin (69-53-4), 4-Chlorobenzoate (74-11-3), 3-Methyl-salicylate (83-40-9), Penicillin V (87-08-1), 2-Iodobenzoate (88-67-5), 2-Nitrophenolate (88-75-5), 5-Methyl-salicylate (89-56-5), 2-Chlorophenolate (95-57-8), Benzenesulfonate (98-11-3), 3-Methylbenzoate (99-04-7), 3-Hydroxybenzoate (99-06-9), 4-methylbenzoate (99-94-5), 4-Hydroxybenzoate (99-96-7), 4-Nitrophenolate (100-02-7), Terephthalate (100-21-0), 4-methylbenzenesulfonate (104-15-4), 4-Bromophenolate (106-41-2), 4-Chlorophenolate (106-48-9), |

|     |                                                                                                                                                                                                                                                                                                                                                                                                                                                                                                                                                                                                                                                                                                                                                                                                                                                                                                                                                                                                                                                                                                                                                                                                                                                                                                                                                                                                                                                                                                                                                                                                                                                                                                                                                                                                                                                                                                                                                                    |
|-----|--------------------------------------------------------------------------------------------------------------------------------------------------------------------------------------------------------------------------------------------------------------------------------------------------------------------------------------------------------------------------------------------------------------------------------------------------------------------------------------------------------------------------------------------------------------------------------------------------------------------------------------------------------------------------------------------------------------------------------------------------------------------------------------------------------------------------------------------------------------------------------------------------------------------------------------------------------------------------------------------------------------------------------------------------------------------------------------------------------------------------------------------------------------------------------------------------------------------------------------------------------------------------------------------------------------------------------------------------------------------------------------------------------------------------------------------------------------------------------------------------------------------------------------------------------------------------------------------------------------------------------------------------------------------------------------------------------------------------------------------------------------------------------------------------------------------------------------------------------------------------------------------------------------------------------------------------------------------|
|     | <p>Sarcosine (107-97-1), 3-Chlorophenolate (108-43-0), Diatrizoate (117-96-4), o-Toluate (118-90-1), 2-Chlorobenzoate (118-91-2), Orotidine (314-50-1), caffeate (331-39-5), 2-Fluorophenolate (367-12-4), 4-Fluorophenolate (371-41-5), 3-Fluorophenolate (372-20-3), 2-Fluorobenzoate (445-29-4), 3-Fluorobenzoate (455-38-9), 4-Fluorobenzoate (456-22-4), 3-Hydroxykynurenine (484-78-6), Hydrocinnamate (501-52-0), p-Coumarate (501-98-4), 3-Chlorobenzoate (535-80-8), 6-Aminopenicillanate (551-16-6), 3-Nitrophenolate (554-84-7), 6-Methyl-salicylate (567-61-3), 4-Bromobenzoate (586-76-5), 3-Bromophenol (591-20-8), Pentafluorobenzoate (602-94-8), 2-Cyanophenolate (611-20-1), 3-Iodobenzoate (618-51-9), 4-Iodobenzoate (619-58-9), 4-Cyanobenzoate (619-65-8), 3-Nitrotyrosine (621-44-3), Glycylglycylglycylglycine (637-84-3), GlyTyrOH (658-79-7), Glycylserine (687-38-7), Glycylproline (704-15-4), 4-Hydroxybenzoxonitrile (767-00-0), Pentafluorothiophenolate (771-62-0), Glycylleucine (869-19-2), 3-Hydroxybenzoxonitrile (873-62-1), Clofibrate (882-09-7), Alanylalanylalanylalanine (26-79-4), N-Formylkynurenine (1022-31-7), DL-Alanyl-Glycine (1188-01-8), Selenomethionine (1464-42-2), Glycylvaline (1963-21-9), Methyl thioglycolate (2365-48-2), ProGly (2578-57-6), Alanylalanine (2867-20-1), Glycylphenylalanine (3321-03-7), Phenylalanine (3617-44-5), Glycyl-<math>\beta</math>-alanine (3695-73-6), GlyLeuTyr (4306-24-5), Carbenicillin (4697-36-3), Alanylalanylalanine (5874-90-8), Arginine (7004-12-8), Glycylglycylglycylglycylglycine (7093-67-6), LeuAla (7298-84-2), Glycyl-L-glutamate (7412-78-4), GlyGlyAla (19729-30-7), Baicalin (21967-41-9), Gemfibrozil (25812-30-0), Amoxicillin (26787-78-0), Glycylglycyl-<math>\beta</math>-alanine (42538-53-4), S-Nitroso-L-cysteine (51209-75-7), Tyrosine (55520-40-6), Glycylaspartate (79731-35-4), S-Nitroso-N-acetyl-D,L-penicillamine (152971-80-7)</p> |
| -OH | <p>2-Hydroxypropionate (50-21-5), 2-Hydroxypropionic acid (50-21-5), Hydroxyproline (51-35-4), Adrenaline (51-43-4), Atropine (51-55-8), 6-Azauridine (54-25-1), Chloramphenicol (56-75-7), DL-glyceraldehyde (56-82-</p>                                                                                                                                                                                                                                                                                                                                                                                                                                                                                                                                                                                                                                                                                                                                                                                                                                                                                                                                                                                                                                                                                                                                                                                                                                                                                                                                                                                                                                                                                                                                                                                                                                                                                                                                          |

---

6), Ethynyl estradiol (57-63-6), Adenosine (58-61-7), Inosine (58-63-9), Uridine (58-96-8), Tetracycline (60-54-8), Cytidylate (63-37-6), Pyridoxine (65-23-6), Cytidine (65-46-3), Benzoic acid (65-85-0), Pyridoxal (66-72-8), D-Mannitol (69-65-8), Chloroacetic acid (79-11-8), Hydroxyacetic acid (79-14-1), 2-Methylpropenoic acid (79-41-4), 2-Mercaptopropionic acid (79-42-5), Cumene hydroperoxide (80-15-9), Riboflavine (83-88-5), Guanosine monophosphate (85-32-5), 3-Chloro-1,2-propanediol (96-24-2), Methyl hydroxyacetate (96-35-5), Benzenemethanol (100-51-6), N-Phenylhydroxylamine (100-65-2), 2-Chloroethanol (107-07-3), Acetaldoxime (107-29-9), 3-Mercaptopropionic acid (107-96-0), Butanedioic acid (110-15-6), Maleic acid (110-16-7), Sorbic acid (110-44-1), Sulfasuccidine (116-43-8), Quercetin (117-39-5), Guanosine (118-00-3), 2-Hydroxy-2-phenylacetophenone (119-53-9), Acetone oxime (127-06-0), Hydroxyurea (127-07-1), Quinine (130-95-0), 4-(2-Acetylsulfamyl)phthalanilic acid (131-69-1), trans-Cinnamic acid (140-10-3), 2-Aminoethanol (141-43-5), Malonic acid (141-82-2), Oxalic acid (144-62-7), Flavine mononucleotide (146-17-8), Rutin (153-18-4), Orotidine(314-50-1), Metronidazole (443-48-1), Arabinitol (488-82-4), (Z)-2-Butenoic acid (503-64-0), 3-Hydroxy-2-butanone (513-86-0), Genistin (529-59-9), Deoxyribose (533-67-5), 2-Bromoethanol (540-51-2), 3,3-Dimethylacrylic acid (541-47-9), 2-Hydroxyethyl acetate (542-59-6), Nifuroxime (555-15-7), Glycylglycine (556-50-3), 3-Buten-2-ol (598-32-3), 2-Hydroxyacetamide (598-42-5), Gossypin (652-78-8), Glycylserine (687-38-7), 2-Hydroxyethyl acrylate (818-61-1), 2-Hydroxyethyl methacrylate (868-77-9), 2'-Deoxyguanosine 5'-monophosphate (902-04-5), Alanylalanylalanylalanine (926-79-4), Benzaldoxime (932-90-1), 4-Nitroperoxybenzoic acid (943-39-5), 4-Chromanol (1481-93-2), 2-Hydroxypropionamide (2043-43-8), 1-Methylguanosine (2140-65-0),  $\alpha$ -Nitrophenyl--D-glucopyranoside (2816-24-2), L-Phenylglycine (2935-35-5), Ribose-5-phosphate (3615-55-2), 4'-Demethylepipodophyllotoxin (006559-91-7), Bistris (6976-37-0), Glycyl-L-glutamate (7412-78-4), Naringin (10236-47-2), Misonidazole (13551-87-6), Daunomycin (20830-81-3), P-Tolylamino-acetic acid (21911-69-3), Baicalin (21967-41-9), Etoposide (33419-42-0), Metoprolol

---



|                        |                                                                                                                                                                                                                                                                                                                                                                                                                                                                                                                                                                                                                                                                                                                                                                                                                                                                                                                                                                                                                                                                                                                                                                                                                                                                                                                                                                                                                                                                                                                                                                                                                                                                                                                                                 |
|------------------------|-------------------------------------------------------------------------------------------------------------------------------------------------------------------------------------------------------------------------------------------------------------------------------------------------------------------------------------------------------------------------------------------------------------------------------------------------------------------------------------------------------------------------------------------------------------------------------------------------------------------------------------------------------------------------------------------------------------------------------------------------------------------------------------------------------------------------------------------------------------------------------------------------------------------------------------------------------------------------------------------------------------------------------------------------------------------------------------------------------------------------------------------------------------------------------------------------------------------------------------------------------------------------------------------------------------------------------------------------------------------------------------------------------------------------------------------------------------------------------------------------------------------------------------------------------------------------------------------------------------------------------------------------------------------------------------------------------------------------------------------------|
|                        | (37350-58-6), S-Nitroso-L-cysteine (51209-75-7), Stachyose (54261-98-2), 8-Brominosine(55627-73-1), Verbascoside (61276-17-3), Iohexol (66108-95-0), 7-O-Methylnogarol (71628-96-1), Ceftazidime (72558-82-8), Iopromide (73334-07-3), Glycyloaspartate (79731-35-4), Ciprofloxacin (85721-33-1), Catechin (88191-48-4), Venlafaxine (93413-69-5), Adenylyl-(2'5')uridine phosphate (93839-87-3), Orbifloxacin (113617-63-3), 5'-(1,4-Dihydro-1-methyl-3-pyridinylcarbonyl)-3'-azido-2',2'-dideoxythymidine (116333-41-6)                                                                                                                                                                                                                                                                                                                                                                                                                                                                                                                                                                                                                                                                                                                                                                                                                                                                                                                                                                                                                                                                                                                                                                                                                       |
| -NH <sub>2</sub> /-NH- | Hydroxyprolinen (51-35-4), Adrenalin (51-43-4), 2,2'-dithiobis(ethylamine) (51-85-4), Chloroquine (54-05-7), Sulfaguanidine (57-67-0), Sulfamethazine (57-68-1), Adenosine (58-61-7), Folate (59-30-3), 2-Aminoethanethiol (60-23-1), Cytidylate (63-37-6), 4-Aminobenzenesulfonamide (63-74-1), Ampicillin (69-53-4), Cytosine (71-30-7), Sulfathiazole (72-14-0), Adenine (73-24-5), Guanine (73-40-5), Isopropylamine (75-31-0), Isobutylamine (78-81-9), 4,4'-Diamino diphenyl sulfone (80-08-0), Guanosine monophosphate (85-32-5), Amodiaquine (86-42-0), Primaquine (90-34-6), Benzhydramine (91-00-9), 2-Naphthylamine (91-59-8), Phenothiazine (92-84-2), Benzidine (92-87-5), 2-Chloroaniline (95-51-2), N,N-Dimethyl-p-phenylenediamine (99-98-9), Benzenemethanamine (100-46-9), 4-Chloroaniline (106-47-8), Sarcosine (107-97-1), 3-Chloroaniline (108-42-9), Cyclohexylamine (108-91-8), 2-Aminopyrimidine (109-12-6), Guanosine (118-00-3), Diphenylamine (122-39-4), Pyrrolidine (123-75-1), Sulfamerazine (127-79-7), 2-Aminoethanol (141-43-5), Sulfamethizole (144-82-1), Kynurenine (343-65-7), Naringenin (480-41-1 3-Hydroxykynurenine (484-78-6), Chrysoidin(495-54-5), 6-Aminopenicillanate (551-16-6), 3,6-Diaminoacridine (553-30-0), 5-Methylcytosine (554-01-8), Glycylglycine (556-50-3), 7-Methylguanine (578-76-7), 4-Aminopyrimidine (591-54-8), 2-Aminoacetamide (598-41-4), 2, 6-Dichloroaniline (608-31-1), Methyl 2-aminoacetate (616-34-2), Selenourea (630-10-4), Sulfamethoxazole (723-46-6), 2,3,4,5,6-Pentafluoroaniline (771-60-8), 2'-Deoxyguanosine 5'-monophosphate (902-04-5), Alanylalanylalanylalanine (926-79-4), 6-Azacytosine (931-85-1), 5-Azacytosine (931-86-2), 7-Methyladenine (935-69- |

|       |                                                                                                                                                                                                                                                                                                                                                                                                                                                                                                                                                                                                                                                                                                                                                                                                  |
|-------|--------------------------------------------------------------------------------------------------------------------------------------------------------------------------------------------------------------------------------------------------------------------------------------------------------------------------------------------------------------------------------------------------------------------------------------------------------------------------------------------------------------------------------------------------------------------------------------------------------------------------------------------------------------------------------------------------------------------------------------------------------------------------------------------------|
|       | 3), 1-Methylcytosine (1122-47-0), 2-Methyladenine (1445-08-5), Atrazine (1912-24-9), 1-Methylguanosine (2140-65-0), Pterin (2236-60-4), ProGly (2578-57-6), L-Phenylglycine (2935-35-5), Glycine anhydride (4202-74-8), Nitracrine (4533-39-5), 9-Methylguanine (5502-78-3), Benzoflavine (6359-38-2), Arginine (7004-12-8), Daunomycin (20830-81-3), P-Tolylamino-acetic acid (21911-69-3), Bupropion (34841-39-9), Metoprolol (37350-58-6), S-Nitroso-L-cysteine (51209-75-7), Pazelliptine (65222-35-7), 6-Aminophenalenone (70402-14-1), Ceftazidime (72558-82-8), Glycylaspartate (79731-35-4), Ciprofloxacin (85721-33-1), Guanidine (90332-86-8), Adenylyl-(2'5')uridine phosphate (93839-87-3), Orbifloxacin (113617-63-3), Duloxetine (116539-59-4)                                     |
| -COOH | 2-Hydroxypropionic acid (50-21-5), Benzoic acid (65-85-0), Chloroacetic acid (79-11-8), Hydroxyacetic acid (79-14-1), 2-Methylpropenoic acid (79-41-4), 2-Mercaptopropionic acid (79-42-5), 3-Mercaptopropionic acid (107-96-0), Sorbic acid (110-44-1), Sulfasuccidine (116-43-8), 4-(2-Acetylsulfamyl)phthalanilic acid (131-69-1), trans-Cinnamic acid (140-10-3), (Z)-2-Butenoic acid (503-64-0), 3,3-Dimethylacrylic acid (541-47-9), Glycylglycine (556-50-3), P-Tolylamino-acetic acid (21911-69-3), Ceftazidime (72558-82-8), Glycylaspartate (79731-35-4), Butanedioic acid (110-15-6), Maleic acid (110-16-7), Malonic acid (141-82-2), Oxalic acid (144-62-7), L-Phenylglycine (2935-35-5), S-Nitroso-L-cysteine (51209-75-7), Ciprofloxacin (85721-33-1), Orbifloxacin (113617-63-3) |
| -X    | Cyclophosphamide (50-18-0), Chlorpromazine (50-53-3), 5-Bromouracil (51-20-7), 5-Fluorouracil (51-21-8), Chloroquine (54-05-7), Carbon tetrachloride (56-23-5), Chloramphenicol (56-75-7), Cloxacillin (61-72-3), Trichloromethane (67-66-3), 1,1,1-Trichloroethane (71-55-6), 4-Chlorobenzoate (74-11-3), Methyl chloride (74-87-3), Methyl iodide (74-88-4), Methylene bromide (74-95-3), Ethyl bromide (74-96-4), Chloroethane (75-00-3), Vinyl chloride (75-01-4), Iodoethane (75-03-6), Methylene iodide (75-11-6), Bromoform (75-25-2), 1,1-Dichloroethane (75-34-3), Vinylidene chloride (75-35-4), Chlorodifluoromethane (75-45-6), Bromotrifluoromethane (75-63-8),                                                                                                                     |

---

Trichlorofluoromethane (75-69-4), Dichlorodifluoromethane (75-71-8), Chlorotrifluoromethane (75-72-9), Trichloronitromethane (76-06-2), 1,1,2-Trichlorotrifluoroethane (76-13-1), 2,2-Dichloro-1,1-difluoro-1-methoxyethane (76-38-0), 2-Bromobutane (78-76-2), Chloroacetone (78-95-5), 1,1,2-Trichloroethane (79-00-5), Trichloroethylene (79-01-6), Chloroacetic acid (79-11-8), 1,1,2,2-Tetrabromoethane (79-27-6), 2-Chloro-6-nitrotoluene (83-42-1), 1,4-Dibromonaphthalene (83-53-4) Amodiaquine (86-42-0), 2-Iodobenzoate (88-67-5), 1-Chloro-2-nitrobenzene (88-73-3), 4-Chloro-2-nitrotoluene (89-59-8), 2-Chlorobenzaldehyde (89-98-5), 2-(Chloromercuri)phenol (90-03-9), 1-Bromonaphthalene (90-11-9), 1-Chloronaphthalene (90-13-1), Chlorodiphenylmethane (90-99-3), 2-Chlorotoluene (95-49-8), 1,2-Dichlorobenzene (95-50-1), 2-Chloroaniline (95-51-2), 2-Bromophenol (95-56-7), 2-Chlorophenol (95-57-8), 2-Chlorophenolate (95-57-8), 3,4-Dichlorotoluene (95-75-0), 3-Chloro-1,2-propanediol (96-24-2), Benzotrichloride (98-07-7), Benzotrifluoride (98-08-8), 1-Chloro-4-nitrobenzene (100-00-5), Benzyl chloride (100-44-7), 4-Chlorobenzaldehyde (104-88-1), 1-Bromo-4-chlorobenzene (106-39-8), 4-Bromophenol (106-41-2), 4-Bromophenolate (106-41-2), 4-Chlorotoluene (106-43-4), 1,4-Dichlorobenzene (106-46-7), 4-Chloroaniline (106-47-8), 4-Chlorophenol (106-48-9), 4-Chlorophenolate (106-48-9), 1-Bromopropane (106-94-5), 1-Bromo-2-chloroethane (107-04-0), 1,2-Dichloroethane (107-06-2), 2-Chloroethanol (107-07-3), 1-Iodopropane (107-08-4), 1,3-Dibromobenzene (108-36-1), 1-Bromo-3-chlorobenzene (108-37-2), 1-Chloro-3-methylbenzene (108-41-8), 3-Chloroaniline (108-42-9), 3-Chlorophenol (108-43-0), 3-Chlorophenolate (108-43-0), Bromobenzene (108-86-1), Chlorobenzene (108-90-7), 1-Bromobutane(109-65-9), 1-Chlorobutane (109-69-3), 1-Bromopentane(110-53-2), Bromphenol Blue (115-39-9), Diatrizoate (117-96-4), 2-Chlorobenzoate (118-91-2), 2,4-Dichlorophenol (120-83-2), 1-Chloro-3-nitrobenzene (121-73-3), Tetrachloroethylene (127-18-4), Iodoacetamide (144-48-9), Pentafluorobenzene (363-72-4), 1,2-Difluorobenzene (367-11-3), 2-Fluorophenolate (367-12-4), 4-Fluorophenolate (371-41-5), 3-Fluorophenolate

---

---

(372-20-3), Hexafluorobenzene (392-56-3), Fluoroacetone (430-51-3), Methyl trifluoroacetate (431-47-0), Diazepam (439-14-5), 2-Fluorobenzoate (445-29-4), 3-Fluorobenzoate (455-38-9), 4-Fluorobenzoate (456-22-4), Tribromonitromethane (464-10-8), 2-Bromo-2-methylpropane (507-19-7), 1-Chloro-2-methylpropane (513-36-0), 1,1-Dichloroacetone (513-88-2), 3-Chlorobenzoate (535-80-8), 1,4-Difluorobenzene (540-36-3), 2-Bromoethanol (540-51-2), 1-Chloropropane (540-54-5), 1,3-Dichlorobenzene (541-73-1), Butyl iodide (542-69-8), Trichloroacetonitrile (545-06-2), 1,2,3,4-Tetrafluorobenzene (551-62-2), Bromonitromethane (563-70-2), 4-Bromobenzoate (586-76-5), 3-Chlorobenzaldehyde (587-04-2), 3-Bromophenolate (591-20-8), 3-Bromophenol (591-20-8), Iodobenzene (591-50-4), Pentafluorobenzoate (602-94-8), 2, 6-Dichloraniline (608-31-1), 2-Chlorobenzyl chloride (611-19-8), 3-Iodobenzoate (618-51-9), 4-Iodobenzoate (619-58-9), Phenethyl chloride (622-24-2), 2',3',4',5',6'-Pentafluoroacetophenone (652-29-9), 2,3,4,5,6-Pentafluorostyrene (653-34-9), Pentafluorobenzaldehyde (653-37-2), 1-Bromo-2-chlorobenzene (694-80-4), 2-Bromo-4-chlorophenol (695-96-5), 5-Iodouracil (696-07-1), 2,3,4,5,6-Pentafluoroaniline (771-60-8), Pentafluorophenol (771-61-9), Pentafluorothiophenolate (771-62-0), pentafluorobenzonitrile (773-82-0), Iodopentafluorobenzene (827-15-6), Pentafluorophenylhydrazine (828-73-9), Pentafluoronitrobenzene (880-78-4), Clofibrate (882-09-7), 1,1,1-Trichloroacetone (918-00-3), Bromodichloronitromethane (918-01-4), Endosulfan sulphate (1031-07-8), Dibromochloronitromethane (1184-89-0), 4-Fluorobenzonitrile (1194-02-1), Clonazepam (1622-61-3), Chloronitromethane (1794-84-9), 5-Chlorouracil (1820-81-1), Atrazine (1912-24-9), Trifluoroiodomethane (2314-97-8), 3-Chloroanisole (2845-89-8), 2-Bromo-5-nitrothiazole (3034-48-8), Di (4-chlorophenyl) sulfoxide (3085-42-5), 4-Bromo-2-chlorophenol (3964-56-5), 3-Chloropropionamide (5875-24-1), Dichloronitromethane (7119-89-3), 2-Chloro-1,1,2-trifluoro-1-(difluoromethoxy)ethane (13838-16-9), Methyl 2-chloropropionate (17639-93-9), 2-Chloropropionamide (27816-36-0), Bupropion (34841-39-9), 8-Bromoinosine (55627-73-1), 6-Chloromelatonin

---

|     |                                                                                                                                                                                                                                                                                                                                                                                                                                                                                                                                                                                                                                                                                                                                                                                                                                                                                                                                                                                                                                                                                                                                                                                                                                                                                                                                                                                                                                                                                                                                                                                                                                                                                                                                                                                                                                                                                                                                                                                                                                                             |
|-----|-------------------------------------------------------------------------------------------------------------------------------------------------------------------------------------------------------------------------------------------------------------------------------------------------------------------------------------------------------------------------------------------------------------------------------------------------------------------------------------------------------------------------------------------------------------------------------------------------------------------------------------------------------------------------------------------------------------------------------------------------------------------------------------------------------------------------------------------------------------------------------------------------------------------------------------------------------------------------------------------------------------------------------------------------------------------------------------------------------------------------------------------------------------------------------------------------------------------------------------------------------------------------------------------------------------------------------------------------------------------------------------------------------------------------------------------------------------------------------------------------------------------------------------------------------------------------------------------------------------------------------------------------------------------------------------------------------------------------------------------------------------------------------------------------------------------------------------------------------------------------------------------------------------------------------------------------------------------------------------------------------------------------------------------------------------|
|     | (63762-74-3), Iohexol (66108-95-0), Iopromide (73334-07-3), Ciprofloxacin (85721-33-1), $\alpha$ -(3-Pyridyl 1-oxide)-N-tert-butylnitron (88283-41-4), Orbifloxacin (113617-63-3), Bromochloronitromethane (135531-25-8)                                                                                                                                                                                                                                                                                                                                                                                                                                                                                                                                                                                                                                                                                                                                                                                                                                                                                                                                                                                                                                                                                                                                                                                                                                                                                                                                                                                                                                                                                                                                                                                                                                                                                                                                                                                                                                    |
| -Ph | Chlorpromazine (50-53-3), 4-Methyl-salicylate (50-85-1), Adrenaline (51-43-4), Chloroquine (54-05-7), Pyridoxal phosphate (54-47-7), Benzamide (55-21-0), Chloramphenicol (56-75-7), Ethynyl estradiol (57-63-6), Sulfaguanidine (57-67-0), Sulfamethazine (57-68-1), Menadione (58-27-5), Adenosine (58-61-7), Inosine (58-63-9), Folate (59-30-3), Nitrofurazone (59-87-0), Tetracycline (60-54-8), Methicillin (61-32-5), Cloxacillin (61-72-3), 4-Aminobenzenesulfonamide (63-74-1), Pyridoxine (65-23-6), Benzoic acid (65-85-0), Pyridoxal (66-72-8), Nitrofurantoin (67-20-9), 6-Hydroxypurine (68-94-0), Sulfathiazole(72-14-0), Adenine (73-24-5), Guanine (73-40-5), 4-Chlorobenzoate (74-11-3), 4,4'-Diamino diphenyl sulfone (80-08-0), 3-Methyl-salicylate (83-40-9), 2-Chloro-6-nitrotoluene (83-42-1), 1,4-Dibromonaphthalene (83-53-4), Riboflavine (83-88-5), Diethyl phthalate (84-66-2), Guanosine monophosphate (85-32-5), Amodiaquine (86-42-0), 1-Naphthonitrile (86-53-3), Penicillin V (87-08-1), 2-Iodobenzoate (88-67-5), 1-Chloro-2-nitrobenzene (88-73-3), 5-Methyl-salicylate (89-56-5), 4-Chloro-2-nitrotoluene (89-59-8), 2-Chlorobenzaldehyde (89-98-5), 2-(Chloromercuri)phenol (90-03-9), 1-Bromonaphthalene (90-11-9), 1-Chloronaphthalene (90-13-1), 1-naphthol (90-15-3), Primaquine(90-34-6), Anthrone (90-44-8), 4,4'-Dimethoxybenzophenone (90-96-0), 2-Benzoylpyridine (91-02-1), 2-Naphthylamine (91-59-8), 5-Nitro-2-furaldehyde diacetate (92-55-7), 3-Hydroxy-N-(2',4'-dimethylphenyl)-2-naphthamide (92-75-1), Phenothiazine (92-84-2), Benzidine (92-87-5), Propylparaben (94-13-3), Chlorotoluene (95-49-8), 1,2-Dichlorobenzene (95-50-1), 2-Chloroaniline (95-51-2), 2-Bromophenol (95-56-7), 2-Chlorophenol (95-57-8), 3,4-Dichlorotoluene (95-75-0), Acetophenone (98-86-2), 3-Pyridinecarboxamide(98-92-0), Nitrobenzene (98-95-3), N,N-Dimethyl-p-phenylenediamine (99-98-9), 4-Nitrotoluene (99-99-0), 1-Chloro-4-nitrobenzene (100-00-5), 4-Nitrophenol (100-02-7), 4-Nitroacetophenone (100-19-6), |

---

Cyanobenzene (100-47-0), Benzaldehyde (100-52-7), N-Phenylhydroxylamine (100-65-2), Acetaminophen (103-90-2), 4-Chlorobenzaldehyde (104-88-1), 1-Bromo-4-chlorobenzene (106-39-8), 4-Bromophenol (106-41-2), 4-Chlorotoluene (106-43-4), 1,4-Dichlorobenzene (106-46-7), 4-Chloroaniline (106-47-8), 4-Chlorophenol (106-48-9), 1,3-Dibromobenzene (108-36-1), 1-Bromo-3-chlorobenzene (108-37-2), 1-Chloro-3-methylbenzene (108-41-8), 3-Chloroaniline (108-42-9), 3-Chlorophenol (108-43-0), Bromobenzene (108-86-1), Chlorobenzene (108-90-7), 3-Hydroxypyridine (109-00-2), 2-Aminopyrimidine (109-12-6), Bromphenol Blue (115-39-9), Quercetin (117-39-5), Diatrizoae (117-96-4), Guanosine (118-00-3), 2-Chlorobenzoate (118-91-2), 2-Hydroxy-2-phenylacetophenone (119-53-9) Benzophenone (119-61-9), 2,4-Dichlorophenol (120-83-2), 2,4-Dinitrotoluene (121-14-2), 1-Chloro-3-nitrobenzene (121-73-3), Diphenylamine (122-39-4), Sulfamerazine (127-79-7), Quinine (130-95-0), Dimethyl phthalate (131-11-3), 4-(2-Acetylsulfamyl)phthalanilic acid (131-69-1), Benzil (134-81-6), 2-Naphthol (135-19-3), N,N-Dimethyl-4-nitrosoaniline (138-89-6), 2-Pyridone (142-08-5), Sulfamethizole (144-82-1), Flavinemononucleotide (146-17-8), Rutin (153-18-4), 8-Methoxypsoralen (298-81-7), caffeate (331-39-5), Kynurenine (343-65-7), 3-Acetylpyridine (350-03-8), Pentafluorobenzene (363-72-4), N,N,N',N'-Tetramethylbenzidine (366-29-0), 1,2-Difluorobenzene (367-11-3), Hexafluorobenzene (392-56-3), Diazepam(439-14-5), Metronidazole (443-48-1), 2-Fluorobenzoate (445-29-4), Genistein (446-72-0), 3-Fluorobenzoate (455-38-9), 4-Fluorobenzoate (456-22-4), Naringenin (480-41-1), 5-Hydroxy-1,4-naphthoquinone (481-39-0), 5-hydroxy-2-methyl-1,4-naphthoquinone (481-42-5), 3-Hydroxykynurenine (484-78-6), 9-Fluorenone (486-25-9), Baicalein (491-67-8), Chrysoeriol (491-71-4), Acridine Orange(494-38-2), Chrysoidin (495-54-5), p-Coumarate (501-98-4), 2-Nitroimidazole (527-73-1), Genistin (529-59-9), 3-Chlorobenzoate (535-80-8), 1,4-Difluorobenzene (540-36-3), 1,3-Dichlorobenzene (541-73-1), 1,2,3,4-Tetrafluorobenzene (551-62-2), 3,6-Diaminoacridine (553-30-0), Nifuroxime (555-15-7), 6-Methyl-salicylate (567-61-3), 7-Methylguanine (578-76-7), 4-Bromobenzoate (586-76-5), 3-

---

---

Chlorobenzaldehyde (587-04-2), 3-Bromophenolate (591-20-8), Iodobenzene (591-50-4), 4-Aminopyrimidine (591-54-8), Pentafluorobenzoate(602-94-8), 5-Nitroquinoline (607-34-1), 8-Nitroquinoline (607-35-2), 2, 6-Dichloraniline (608-31-1), 2-Nitrothiophene (609-40-5), 2-Chlorobenzyl chloride(611-19-8), 2-Naphthonitrile (613-46-7), 6-Nitroquinoline (613-50-3), 7-Nitro-quinoline (613-51-4), Methylphenyl nitrosamine (614-00-6), 3-Iodobenzoate (618-51-9), 4-Iodobenzoate (619-58-9), 4-Cyanobenzoate (619-65-8), 3-Nitrotyrosine (621-44-3), 1,4-Dicyanobenzene (623-26-7), 4-Pyridinol (626-64-2), 2',3',4',5',6'-Pentafluoroacetophenone (652-29-9), Gossypin (652-78-8), 2,3,4,5,6-Pentafluorostyrene (653-34-9), Pentafluorobenzaldehyde (653-37-2), GlyTyrOH(658-79-7), 1-Bromo-2-chlorobenzene (694-80-4),2-Bromo-4-chlorophenol (695-96-5), 5-Iodouracil (696-07-1), 2-Methyl-4-nitroimidazole (696-23-1), 5-Nitro-2-furaldehyde (698-63-5), Sulfamethoxazole (723-46-6), Vinyl benzoate (769-78-8), 2,3,4,5,6-Pentafluoroaniline (771-60-8), Pentafluorophenol (771-61-9), Pentafluorothiophenolate (771-62-0), pentafluorobenzonitrile (773-82-0), 3-Nitrothiophene (822-84-4), Iodopentafluorobenzene (827-15-6), Pentafluorophenylhydrazine (828-73-9), 2,4,6-Trimethoxy-1,3,5-triazine (877-89-4), Pentafluoronitrobenzene (880-78-4), Clofibrate (882-09-7), 2'-Deoxyguanosine 5'-monophosphate (902-04-5), 4-Nitroisothiazole (931-07-7), 5-Azacytosine (931-86-2), Benzaldoxime (932-90-1), 7-Methyladenine (935-69-3), 4-Nitroperoxybenzoic acid (943-39-5), 5-Methoxyindole (1006-94-6), N-Formylkynurenine (1022-31-7), 4-Fluorobenzonitrile (1194-02-1), 2-Methyladenine (1445-08-5), 4-Pyridinecarboxamide (1453-82-3), 4-Chromanol (1481-93-2), Clonazepam (1622-61-3), Atrazine (1912-24-9), 1-Methylguanosine (2140-65-0), Pterin (2236-60-4),  $\alpha$ -Nitrophenyl-D-glucopyranoside (2816-24-2), 3-Chloroanisole (2845-89-8), 4-Nitroimidazole (3034-38-6), 2-Bromo-5-nitrothiazole (3034-48-8), Di (4-chlorophenyl) sulfoxide (3085-42-5), Furamazone (3270-71-1), 4-Bromo-2-chlorophenol (3964-56-5), GlyLeuTyr (4306-24-5), Nitracrine (4533-39-5), N-(2-Acetylphenyl)formamide (5257-06-7), 3,5-Dinitroanisole (5327-44-6), 3-Benzoylpyridine (5424-19-1), 9-Methylguanine (5502-78-3), 2-

---

|       |                                                                                                                                                                                                                                                                                                                                                                                                                                                                                                                                                                                                                                                                                                                                                                                                                                                                                                                                                                                                                                                                                                                                                                                                                                                                                                                                                                                                                                                                                                                                                                                                                    |
|-------|--------------------------------------------------------------------------------------------------------------------------------------------------------------------------------------------------------------------------------------------------------------------------------------------------------------------------------------------------------------------------------------------------------------------------------------------------------------------------------------------------------------------------------------------------------------------------------------------------------------------------------------------------------------------------------------------------------------------------------------------------------------------------------------------------------------------------------------------------------------------------------------------------------------------------------------------------------------------------------------------------------------------------------------------------------------------------------------------------------------------------------------------------------------------------------------------------------------------------------------------------------------------------------------------------------------------------------------------------------------------------------------------------------------------------------------------------------------------------------------------------------------------------------------------------------------------------------------------------------------------|
|       | <p>Nitropyrrole (5919-26-6), 3-Nitropyrrole(5930-94-9), Benzoflavine (6359-38-2), 4'-Demethylepipodophyllotoxin (6559-91-7), 2,4-Dimethyl-6-hydroxypyrimidine (6622-92-0), 4',5'-Dihydropsoralen (7535-48-0), Naringin (10236-47-2), Misonidazole (13551-87-6), 4-Benzoylpyridine (14548-46-0), 3-Nitroquinoline (17576-53-3), 2,1,3-Benzothiadiazole-4,7-dicarbonitrile (20138-79-8), 2,4-Diethoxypyrimidine (20461-60-3), Daunomycin (20830-81-3), P-Tolylamino-acetic acid (21911-69-3), Baicalin (21967-41-9), 1,2,3,5-Tetramethylisoindole-4,7-dione (24686-78-0), 2,3-Bis(2-pyridyl)-5,6-dihydropyrazine (25005-95-2), Gemfibrozil (25812-30-0),3-Nitropyrazole (26621-44-3), Methoxyphenol (26638-03-9), Amoxicillin (26787-78-0), 1,10-Phenanthroline-5,6-dione (27318-90-7), 2-Nitrobenzofuran (33094-66-5), Etoposide (33419-42-0), Bupropion (34841-39-9), Metoprolol (37350-58-6), 5-Hydroxy-2-nitrobenzofuran (40024-32-6), 4,6-Dihydroxy-2-methylpyrimidine (40497-30-1), 7-Hydroxy-2-nitrobenzofuran (40739-73-9), Tyrosine (55520-40-6), 8-Bromoinosine (55627-73-1), Verbascoside (61276-17-3), 5-Deazalumiflavin (61696-29-5), 6-Chloromelatonin (63762-74-3), Pazelliptine (65222-35-7), Iohexol (66108-95-0), 6-Aminophenalenone (70402-14-1), 7-O-Methylnogarol (71628-96-1), Ceftazidime (72558-82-8), Iopromide (73334-07-3), Ciprofloxacin (85721-33-1), Catechin (88191-48-4), <math>\alpha</math>-(3-Pyridyl 1-oxide)-N-tert-butylnitron (88283-41-4), Venlafaxine (93413-69-5), Adenylyl-(2'5')uridine phosphate (93839-87-3), Orbifloxacin (113617-63-3), Duloxetine (116539-59-4)</p> |
| -CO-R | <p>Menadione (58-27-5), Tetracycline (60-54-8), 2-Propanone (67-64-1), Camphor (76-22-2), Methyl vinyl ketone (78-94-4), Chloroacetone (78-95-5), 2-Nitrophenolate (88-75-5), Anthrone (90-44-8), 4,4'-Dimethoxybenzophenone (90-96-0), 2-Benzoylpyridine (91-02-1), 2-Chlorophenolate (95-57-8), Acetophenone (98-86-2), 3-Hydroxybenzoate (99-06-9), 4-Hydroxybenzoate (99-96-7), 4-Nitrophenolate (100-02-7), 4-Nitroacetophenone (100-19-6), 1,3-Diphenyl-2-propanone (102-04-5), 4-Bromophenolate (106-41-2), 4-Chlorophenolate (106-48-9), 1,4-Benzoquinone (106-51-4), 3-Chlorophenolate</p>                                                                                                                                                                                                                                                                                                                                                                                                                                                                                                                                                                                                                                                                                                                                                                                                                                                                                                                                                                                                                |



|                  |                                                                                                                                                                                                                                                                                                                                                                                                                                                                                                                                                                                                                                                                                                                                                                                                                                                                                                                                                                                                                                                                                                                                                                                                                                                                                                                                                                                                                                                                                                                                                                                                                                                                      |
|------------------|----------------------------------------------------------------------------------------------------------------------------------------------------------------------------------------------------------------------------------------------------------------------------------------------------------------------------------------------------------------------------------------------------------------------------------------------------------------------------------------------------------------------------------------------------------------------------------------------------------------------------------------------------------------------------------------------------------------------------------------------------------------------------------------------------------------------------------------------------------------------------------------------------------------------------------------------------------------------------------------------------------------------------------------------------------------------------------------------------------------------------------------------------------------------------------------------------------------------------------------------------------------------------------------------------------------------------------------------------------------------------------------------------------------------------------------------------------------------------------------------------------------------------------------------------------------------------------------------------------------------------------------------------------------------|
|                  | (108-43-0), Quercetin (117-39-5), 2-Hydroxy-2-phenylacetophenone (119-53-9), Benzophenone (119-61-9), Cyclopentanone (120-92-3), Benzil(134-81-6), 2,5-Dimethyl-1,4-benzoquinone (137-18-8), Rutin (153-18-4), Kynurenine (343-65-7), 3-Acetylpyridine (350-03-8), 2-Fluorophenolate (367-12-4), 4-Fluorophenolate (371-41-5), 3-Fluorophenolate (372-20-3), Fluoroacetone (430-51-3), 2,3-Butanedione (431-03-8), Genistein (446-72-0), 5-Hydroxy-1,4-naphthoquinone (481-39-0), 5-hydroxy-2-methyl-1,4-naphthoquinone (481-42-5), 3-Hydroxykynurenine (484-78-6), 9-Fluorenone (486-25-9), Baicalein (491-67-8), Chrysoeriol (491-71-4), 3-Hydroxy-2-butanone (513-86-0), 1,1-Dichloroacetone (513-88-2), 2,3,5,6-Tetramethylbenzoquinone (527-17-3), Genistin (529-59-9), 3-Nitrophenolate (554-84-7), 3-Bromophenol (591-20-8), 2-Cyanophenolate (611-20-1), 2',3',4',5',6' Pentafluoroacetophenone (652-29-9), Gossypin (652-78-8), 4-Hydroxybenzotrile (767-00-0), Ketophenylbutazone (853-34-9), 3-Hydroxybenzotrile (873-62-1), 1,1,1-Trichloroacetone (918-00-3), N-Formylkynurenine (1022-31-7), N-(2-Acetylphenyl)formamide (5257-06-7), 3-Benzoylpyridine (5424-19-1), Naringin (10236-47-2), Camphoroquinone (10373-78-1), 4-Benzoylpyridine (14548-46-0), Daunomycin (20830-81-3), Baicalin (21967-41-9), 1,2,3,5-Tetramethylisindole-4,7-dione (24686-78-0), 1,10-Phenanthroline-5,6-dione (27318-90-7), Bupropion (34841-39-9), 6-Aminophenalenone (70402-14-1), 7-O-Methylnogarol (71628-96-1), Ciprofloxacin (85721-33-1), Orbifloxacin (113617-63-3), 5'-(1,4-Dihydro-1-methyl-3-pyridinylcarbonyl)-3'-azido-2',2'-dideoxythymidine (116333-41-6) |
| -CHO             | Pyridoxal phosphate (54-47-7), DL-glyceraldehyde (56-82-6), Pyridoxal(66-72-8), Acetaldehyde (75-07-0), 2 Chlorobenzaldehyde (89-98-5), Benzaldehyde (100-52-7), 4-Chlorobenzaldehyde (104-88-1), Propionaldehyde (123-38-6), 3-Chlorobenzaldehyde (587-04-2), Pentafluorobenzaldehyde (653-37-2), 5-Nitro-2-furaldehyde (698-63-5), Ribose-5-phosphate (3615-55-2)                                                                                                                                                                                                                                                                                                                                                                                                                                                                                                                                                                                                                                                                                                                                                                                                                                                                                                                                                                                                                                                                                                                                                                                                                                                                                                  |
| -NO <sub>2</sub> | Chloramphenicol (56-75-7), Nitrofurazone (59-87-0), Nitrofurantoin (67-20-9), Nitromethane (75-52-5), Trichloronitromethane (76-06-2), Nitroethane (79-24-3), 2-Chloro-6-nitrotoluene(83-42-1), 1-Chloro-2-nitrobenzene (88-73-3), 2-                                                                                                                                                                                                                                                                                                                                                                                                                                                                                                                                                                                                                                                                                                                                                                                                                                                                                                                                                                                                                                                                                                                                                                                                                                                                                                                                                                                                                                |

---

Nitrophenolate (88-75-5), 4-Chloro-2-nitrotoluene (89-59-8), 5-Nitro-2-furaldehyde diacetate (92-55-7), Nitrobenzene (98-95-3), 4-Nitrotoluene (99-99-0), 1-Chloro-4-nitrobenzene (100-00-5), 4-Nitrophenol (100-02-7), 4-Nitrophenolate (100-02-7), 4-Nitroacetophenone (100-19-6), 1-Nitropropane (108-03-2), 2,4-Dinitrotoluene (121-14-2), 1-Chloro-3-nitrobenzene (121-73-3), Metronidazole (443-48-1), Tribromonitromethane (464-10-8), 2-Nitroimidazole (527-73-1), 3-Nitrophenolate (554-84-7), Nifuroxime (555-15-7), Bromonitromethane (563-70-2), 5-Nitroquinoline (607-34-1), 8-Nitroquinoline (607-35-2), 2-Nitrothiophene (609-40-5), 5-Nitouracil (611-08-5), 6-Nitroquinoline (613-50-3), 7-Nitro-quinoline (613-51-4), 3-Nitrotyrosine (621-44-3), 2-Methyl-4-nitroimidazole (696-23-1), 5-Nitro-2-furaldehyde (698-63-5), 3-Nitrothiophene (822-84-4), Pentafluoronitrobenzene (880-78-4), Bromodichloronitromethane (918-01-4), 4-Nitroisothiazole (931-07-7), 4-Nitroperoxybenzoic acid (943-39-5), Dibromochloronitromethane (1184-89-0), Clonazepam (1622-61-3), Chloronitromethane (1794-84-9),  $\alpha$ -Nitrophenyl--D-glucopyranoside (2816-24-2), 4-Nitroimidazole (3034-38-6), 2-Bromo-5-nitrothiazole (3034-48-8), Furamazone (3270-71-1), Nitracrine (4533-39-5), 3,5-Dinitroanisole (5327-44-6), 2-Nitropyrrole (5919-26-6), 3-Nitropyrrole (5930-94-9), Dichloronitromethane (7119-89-3), Misonidazole (13551-87-6), 3-Nitroquinoline (17576-53-3), 3-Nitropyrazole (26621-44-3), 2-Nitrobenzofuran (33094-66-5), 5-Hydroxy-2-nitrobenzofuran (40024-32-6), 7-Hydroxy-2-nitrobenzofuran (40739-73-9), Bromochloronitromethane (135531-25-8)

---

## Reference

- [1] <http://kinetics.nist.gov/solution/index.jsp>
- [2] Ayatollahi S, Kalnina D, Song W, Turks M, Cooper W J. Radiation chemistry of salicylic and methyl substituted salicylic acids: Models for the radiation chemistry of pharmaceutical compounds. *Radiation Physics & Chemistry*, 2013, 92(11):93-98.

- [3] Rickman K A, Swancutt K L, Mezyk S P, Kiddle J J. Isoniazid: Radical-induced oxidation and reduction chemistry. *Bioorganic & Medicinal Chemistry Letters*, 2013, 23(10):3096-3100.
- [4] Landsman N A, Swancutt K L, Bradford C N, Cox C R, Kiddle J J, Mezyk S P. Free radical chemistry of advanced oxidation process removal of nitrosamines in water. *Environmental Science & Technology*, 2008, 41(16):5818-5823
- [5] Rickman K A, Mezyk S P. Removing estrogenic steroids from waters: The role of reducing hydrated electron reactions. *Journal of Advanced Oxidation Technologies*, 2011, 14(1): 81-85.
- [6] Mezyk S P, Neubauer T J, Cooper W J, Peller J R. Free-radical-induced oxidative and reductive degradation of sulfa drugs in water: absolute kinetics and efficiencies of hydroxyl radical and hydrated electron reactions. *The Journal of Physical Chemistry A*, 2007, 111(37): 9019-9024.
- [7] Joshi R, Kapoor S, Mukherjee T. Free radical reactions of pyridoxal (vitamin B6): a pulse radiolysis study. *Research on Chemical Intermediates*, 2002, 28(6): 505-515.
- [8] Anbar M, Hart E J. The reactivity of aromatic compounds toward hydrated electrons. *Journal of the American Chemical Society*, 1964, 86(24):5633-5637.
- [9] Mezyk S P, Peller J R, Cole S K, Song W H, Mincher B J, Peake B M, Cooper W J. Studies in radiation chemistry: application to ozonation and other advanced oxidation processes. *Ozone: Science and Engineering*, 2008, 30(1): 58-64.
- [10] Kiddle J J, Mezyk S P. Reductive destruction of chemical warfare agent simulants in water. *The Journal of Physical Chemistry B*, 2004, 108(28): 9568-9570.

- [11] Williams J A, Cooper W J, Mezyk S P, Bartels D M. Absolute rate constants for the reaction of the hydrated electron, hydroxyl radical and hydrogen atom with chloroacetones in water. *Radiation Physics and Chemistry*, 2002, 65(4): 327-334.
- [12] Nalawade P, Naumov S, Kapoor S. Hidden chemistry of substituted aniline radical cations in water: a mechanistic study. *Journal of Physical Organic Chemistry*, 2015, 28(1): 2-9.
- [13] Liu N, Xu G, Wu M, He X X, Tang L, Shi W Y, Wang L, Shao H Y. Radical-induced destruction of diethyl phthalate in aqueous solution: kinetics, spectral properties, and degradation efficiencies studies. *Research on Chemical Intermediates*, 2012, 39(8):3727-3737.
- [14] Lin M, Katsumura Y, Hata K, Katsumura Y, Muroya Y, Fu H, Yamashita S, Nakagawa H. Pulse radiolysis study on free radical scavenger edaravone (3-methyl-1-phenyl-2-pyrazolin-5-one). *Journal of Radiation Research*, 2007, 89(1):36-43.
- [15] Zhu D, Sun D, Jiang, Z L, Wang S L, Sun X Y, Ni Y M. Studies on the respective reactions of quinoline and isoquinoline with transient species by pulse radiolysis. *Acta Physico-Chimica Sinica*, 2008, 24(24):2321-2326.
- [16] Fang H, Gao Y, Li G, An J, Wong P K, Fu H, Yao S, Nie X, An T. Advanced oxidation kinetics and mechanism of preservative propylparaben degradation in aqueous suspension of TiO<sub>2</sub> and risk assessment of its degradation products. *Environmental Science & Technology*, 2013, 47(6): 2704-2712.
- [17] B őr ́Á, Tak ́acs E, Wojn ́arovits L. Rate constants for the reaction of hydrated electrons and hydroxyl radicals with acrylate monomers. *Macromolecular Rapid Communications*, 1996, 17(5): 353-357.

- [18] Yuan H X. Study on mechanism and kinetic of reactions for hydrated electron with halogenated aromatic hydrocarbons. Fudan University, 2012.
- [19] Varghese R, Mohan H, Manoj P, Manoj V M, Aravind U K, Vandana K, Aravindakumar C T. Reactions of hydrated electrons with triazine derivatives in aqueous medium. *Journal of Agricultural and Food Chemistry*, 2006, 54(21): 8171-8176.
- [20] Cai Z, Li X, Katsumura Y. Interaction of hydrated electron with dietary flavonoids and phenolic acids:: Rate constants and transient spectra studied by pulse radiolysis. *Free Radical Biology and Medicine*, 1999, 27(7): 822-829.
- [21] Jeong J, Jung J, Cooper W J, Song W. Degradation mechanisms and kinetic studies for the treatment of X-ray contrast media compounds by advanced oxidation/reduction processes. *Water Research*, 2010, 44(15): 4391-4398.
- [22] Zona R, Solar S, Getoff N, Sehested K, Holcman J. Reactivity of H atoms and hydrated electrons with chlorobenzoic acids. *Radiation Physics and Chemistry*, 2008, 77(2): 162-168.
- [23] Peled E, Golodnitsky D, Menachem C, Bar-Tow D. An advanced tool for the selection of electrolyte components for rechargeable lithium batteries. *Journal of the Electrochemical Society*, 1998, 145(10): 3482-3486.
- [24] Makarov I E, Protasova E L, Khaikin G I. The kinetics of radical reactions in the radiolysis of aqueous solutions of organic nitro compounds. *Russian Journal of Physical Chemistry A, Focus on Chemistry*, 2008, 82(11): 1833-1837.
- [25] Wu M H, Liu N, Xu G, Ma J, Tang L, Wang L, Fu H Y. Kinetics and mechanisms studies on dimethyl phthalate degradation in aqueous solutions by pulse radiolysis and electron beam radiolysis. *Radiation Physics and Chemistry*, 2011, 80(3): 420-425.

- [26] Zuo Z, Yao S, Li H, Lin W, Zhang J, Lin N. Kinetic observation of rapid electron transfer between thymine and thymidine anion radicals and caffeic acid: a pulse radiolysis study. *Journal of Radiation Research & Radiation Processing*, 1995, 13(3): 140-145.
- [27] Shoute L C T. Fate of the radical anion of perfluoroaromatic compounds in aqueous solution. A pulse radiolysis study. *Radiation Physics and Chemistry*, 1997, 49(1): 25-28.
- [28] Mezyk S P, Helgeson T, Cole S K, Cooper W J, Fox R V, Gardinali P R, Mincher B J. Free radical chemistry of disinfection-byproducts. 1. Kinetics of hydrated electron and hydroxyl radical reactions with halonitromethanes in water. *The Journal of Physical Chemistry A*, 2006, 110(6): 2176-2180.
- [29] Joshi R, Gangabhairathi R. Formation of semiquinone radical anion and free radical scavenging reactions of plumbagin: a pulse radiolysis study. *Journal of Radioanalytical and Nuclear Chemistry*, 2015, 303(1):919-924.
- [30] Mishra B, Priyadarsini K I, Kumar M S, Unnikrishnan M K, Mohan H. Effect of O-glycosilation on the antioxidant activity and free radical reactions of a plant flavonoid, chrysoeriol. *Bioorganic & Medicinal Chemistry*, 2003, 11(13): 2677-2685.
- [31] Yuan H, Pan H, Shi J, Li H J, Du W B. Kinetics and mechanisms of reactions for hydrated electron with chlorinated benzenes in aqueous solution. *Frontiers of Environmental Science & Engineering*, 2015, 9(4): 583-590.
- [32] Yu H, Nie E, Xu J, Yan S, Cooper W J, Song W. Degradation of diclofenac by advanced oxidation and reduction processes: kinetic studies, degradation pathways and toxicity assessments. *Water Research*, 2013, 47(5):1909-1918.

- [33] Shi W Q, Fu H Y, Bounds P L, Muroya Y, Lin M Z, Katsumura Y, Zhao Y L, Chai Z F. Nitration activates tyrosine toward reaction with the hydrated electron. *Radiation Research*, 2011, 176(1): 128-133.
- [34] Luke T L, Mohan H, Jacob T A, Manoj V A, Manoj P, Mittal J P, Destailats H, Hoffmann M R, Aravindakumar C T. Kinetic and spectral investigation of the electron and hydrogen adducts of dihydroxy - and dimethyl - substituted pyrimidines: a pulse radiolysis and product analysis study. *Journal of Physical Organic Chemistry*, 2002, 15(5): 293-305.
- [35] Hsieh L L, Lin Y L, Wu C H. Degradation of MTBE in dilute aqueous solution by gamma radiolysis. *Water Research*, 2004, 38(16): 3627-3633.
- [36] S áfr ány Á, Wojnarovits L. Radiolysis of hydroxy ethylacrylate in dilute aqueous solutions. *Radiation Physics and Chemistry*, 1993, 41(3): 531-537.
- [37] Razavi B, Song W, Cooper W J, Greaves J, Joonseon J. Free-radical-induced oxidative and reductive degradation of fibrate pharmaceuticals: kinetic studies and degradation mechanisms. *The Journal of Physical Chemistry A*, 2009, 113(7): 1287-1294.
- [38] Shah N S, Khan J A, Nawaz S, Ismail M, Khan K, Khan H M. Kinetic and mechanism investigation on the gamma irradiation induced degradation of endosulfan sulfate. *Chemosphere*, 2015, 121:18-25.
- [39] Pattison D I, O'Reilly R J, Skaff O, Radom L, Robert F, Anderson R F, Michael J, Davies M J. One-electron reduction of N-chlorinated and N-brominated species is a source of radicals and bromine atom formation. *Chemical Research in Toxicology*, 2011, 24(3): 371-382.

- [40] Basfar A A, Mohamed K A, Al-Abduly A J. Radiolytic degradation of atrazine aqueous solution containing humic substances. *Ecotoxicology and environmental safety*, 2009, 72(3): 948-953.
- [41] Kumar M, Panda A, Sabharwal S. Reactions of N-isopropylacrylamide with some reducing and oxidising radicals in aqueous solutions: a pulse radiolysis study. *Radiation Physics and Chemistry*, 2000, 59(3): 287-293.
- [42] Wu M, Shi W, Zhang H, Jiao Z, Chen J, Yao S, Ding G, Fu J. Photolytical property of L(+)- $\alpha$ -phenylglycine in aqueous solution. *Environmental Chemistry Letters*, 2010, 8(1):25-31.
- [43] Mezyk S P, Ewing D B, Kiddle J J, Madden K P. Kinetics and mechanisms of the reactions of hydroxyl radicals and hydrated electrons with nitrosamines and nitramines in water. *The Journal of Physical Chemistry A*, 2006, 110(14): 4732-4737.
- [44] Lu C, Wang W, Lin W, Xu Q, Pan J, Han Z, Yao S, Liu N. Pulse radiolysis studies of etoposide and 4'-demethylepipodophyllotoxin in aqueous solution. *Radiation Physics and Chemistry*, 2000, 57(2): 151-156.
- [45] Mincher B J, Mezyk S P, Cooper W J, Cole S K, Fox R V, Gardinali P R. Free-radical chemistry of disinfection byproducts. Degradation mechanisms of chloronitromethane, bromonitromethane, and dichloronitromethane. *The Journal of Physical Chemistry A*, 2010, 114(1): 117-125.
- [46] Song W, Chen W, Cooper W J, Greaves J, Miller G E. Free-radical destruction of  $\beta$ -lactam antibiotics in aqueous solution. *The Journal of Physical Chemistry A*, 2008, 112(32): 7411-7417.



- [47] Santoke H, Song W, Cooper W J, Peake B M. Advanced oxidation treatment and photochemical fate of selected antidepressant pharmaceuticals in solutions of Suwannee River humic acid. *Journal of Hazardous Materials*, 2012, 217: 382-390.
- [48] Song W, Cooper W J, Mezyk S P, Greaves J, Peake B M. Free radical destruction of  $\beta$ -blockers in aqueous solution. *Environmental Science & Technology*, 2008, 42(4): 1256-1261.
- [49] Dubey K A, Bhardwaj Y K, Chaudhari C V, Sabharwal H. Mohan. Structure–reactivity studies on the polymerization and crosslinking behavior of tri(propylene glycol) diacrylate in aqueous solutions. *Reactive and Functional Polymers*, 2007, 67(4): 282-293.
- [50] Manoj V M, Mohan H, Aravind U K, Aravindakumar C T. One-electron reduction of S-nitrosothiols in aqueous medium. *Free Radical Biology and Medicine*, 2006, 41(8): 1240-1246.
- [51] Russo M, Jimenez L B, Mulazzani Q G, D'Angelantonio M, Guerra M, Miranda M A, Chatgililoglu C. Chemical radiation studies of 8-bromo-2'-deoxyinosine and 8-bromoinosine in aqueous solutions. *Chemistry - A European Journal*, 2006, 12(29):7684-7693.
- [52] Roberts J E, Hu D N, Wishart J F. Pulse radiolysis studies of melatonin and chloromelatonin. *Journal of Photochemistry and Photobiology B: Biology*, 1998, 42(2): 125-132.
- [53] An T, Yang H, Li G, Song W, Copper W, Nie X. Kinetics and mechanism of advanced oxidation processes (AOPs) in degradation of ciprofloxacin in water. *Applied Catalysis B Environmental*, 2010, 94(3):288-294.
- [54] Tay K A, Boutin A. Hydrated electron diffusion: the importance of hydrogen-bond dynamics. *Journal of Physical Chemistry B*, 2009, 113(35):11943-11949.
